# Supplementary material for: New role of phenothiazine derivatives as peripherally acting CB1 receptor antagonizing anti-obesity agents
Source: PubMed Central journal article supplement (PMC5785958; doi:10.1038/s41598-018-20078-w), 2018-01-26
Supplement: 41598_2018_20078_MOESM1_ESM.pdf [file 41598_2018_20078_MOESM1_ESM.pdf]

## Supporting Information

### New role of phenothiazine derivatives as peripherally acting CB1 receptor antagonizing anti-obesity agents

Mayank Kumar Sharma, Jatin Machhi, Prashant Murumkar, Mange Ram Yadav\*

*Faculty of Pharmacy, Kalabhavan Campus,  
The Maharaja Sayajirao University of Baroda, Vadodara-390 001, Gujarat, India.*

#### Table of Content

|                                  |     |
|----------------------------------|-----|
| <sup>1</sup> H NMR Spectra.....  | S2  |
| <sup>13</sup> C NMR Spectra..... | S14 |

# <sup>1</sup>H-NMR Spectra.

## 4-Amino-2-(2-(2-trifluoromethyl-10H-phenothiazin-10-yl)-2-oxoethylthio)pyrimidine-5-carbonitrile (5)

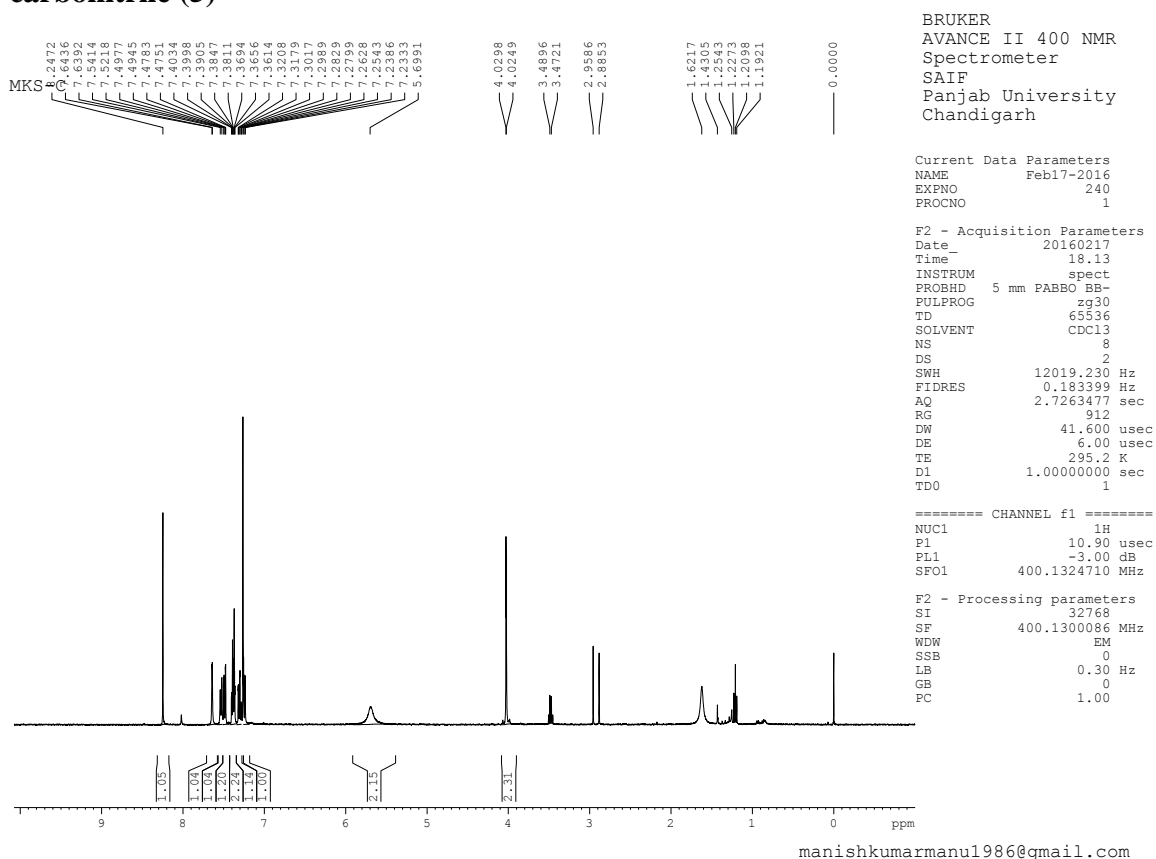

## 4-Amino-2-(2-(2-chloro-10H-phenothiazin-10-yl)-2-oxoethylthio)pyrimidine-5-carbonitrile (22)

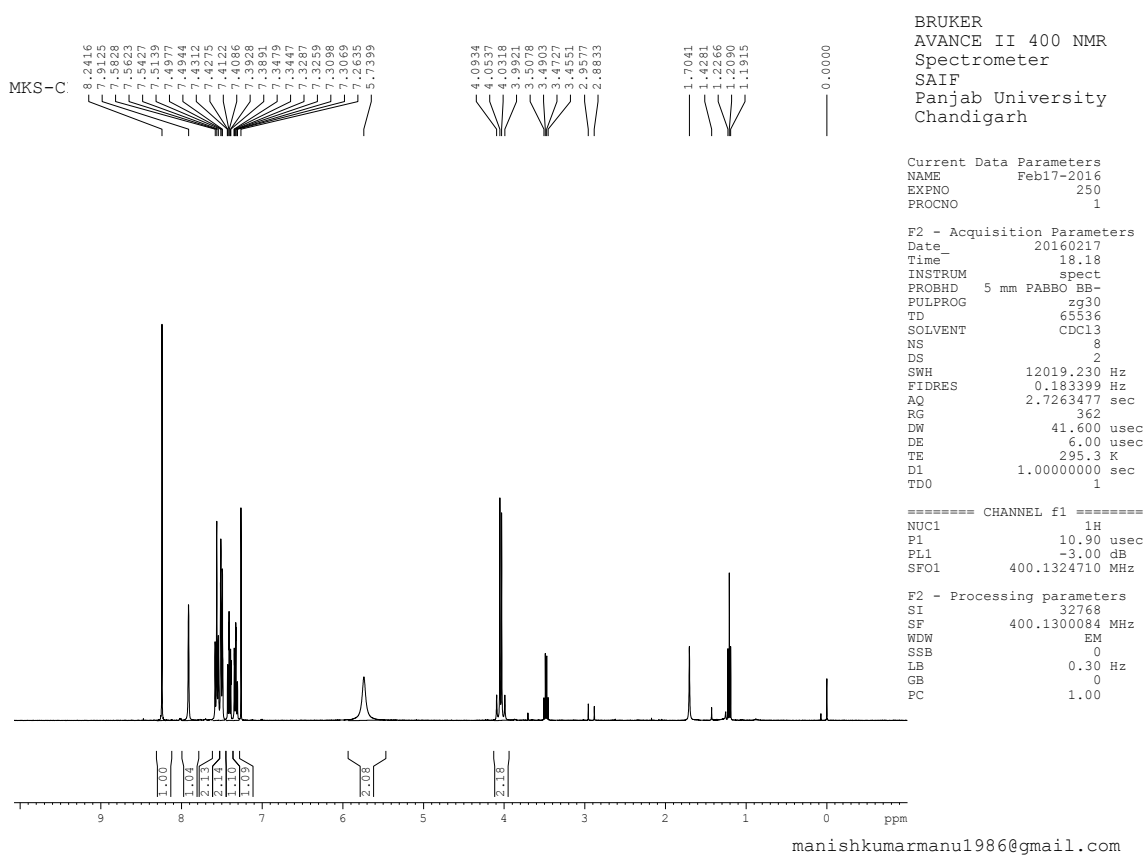

### 4-Amino-2-(2-(2-methoxy-10H-phenothiazin-10-yl)-2-oxoethylthio)pyrimidine-5-carbonitrile (23)

MKS3

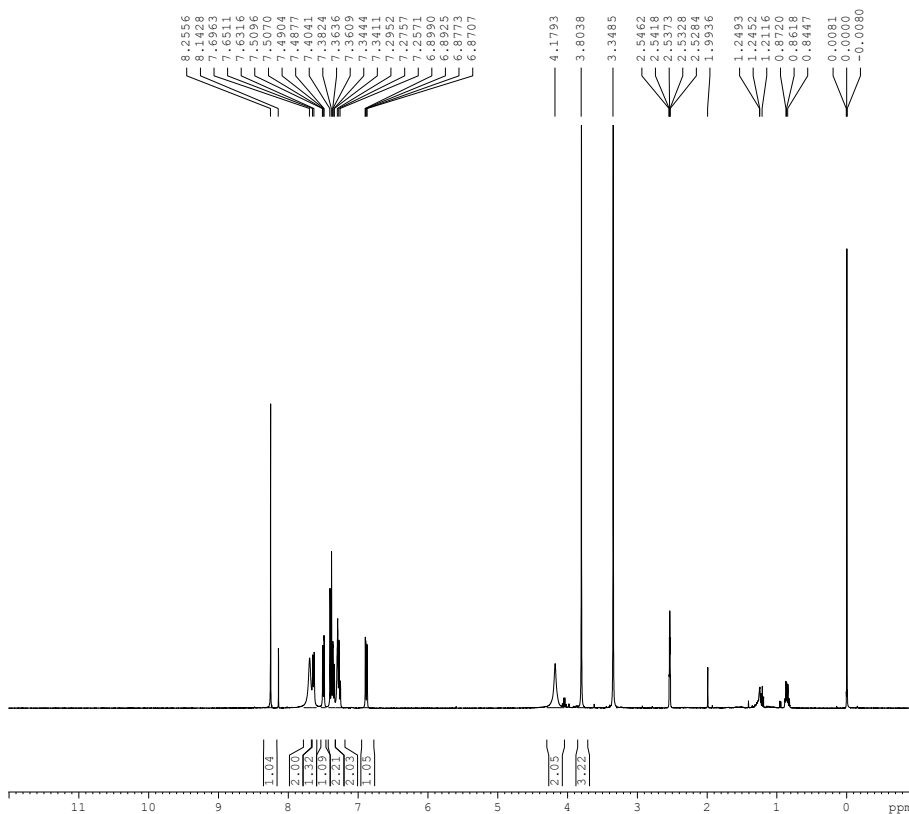

BRUKER  
AVANCE II 400 NMR  
Spectrometer  
SAIF  
Panjab University  
Chandigarh

Current Data Parameters  
NAME Mar09-2016  
EXPNO 270  
PROCNO 1

F2 - Acquisition Parameters  
Date\_ 20160309  
Time\_ 20.42  
INSTRUM spect  
PROBHD 5 mm PABBO BB-  
PULPROG zg30  
TD 65536  
SOLVENT DMSO  
NS 8  
DS 2  
SWH 12019.230 Hz  
FIDRES 0.183399 Hz  
AQ 2.7263477 sec  
RG 287  
DW 41.600 usec  
DE 6.00 usec  
TE 294.5 K  
D1 1.00000000 sec  
TD0 1

===== CHANNEL f1 =====  
NUC1 1H  
P1 10.90 usec  
PL1 -3.00 dB  
SFO1 400.1324710 MHz

F2 - Processing parameters  
SI 32768  
SF 400.1299888 MHz  
WDW EM  
SSB 0  
LB 0.30 Hz  
GB 0  
PC 1.00

manishkumarmanu1986@gmail.com

### 4-Amino-2-(2-oxo-2-(10H-phenothiazin-10-yl)ethylthio)pyrimidine-5-carbonitrile (24)

MKS 04

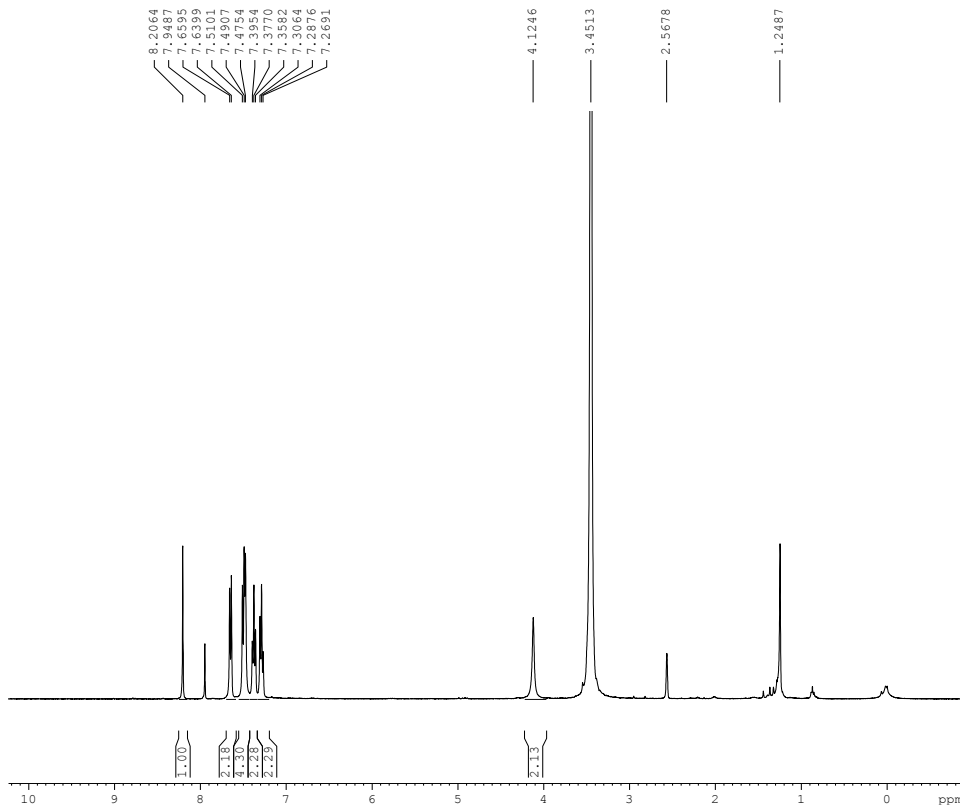

BRUKER  
AVANCE II 400 NMR  
Spectrometer  
SAIF  
Panjab University  
Chandigarh

Current Data Parameters  
NAME Sep14-2016  
EXPNO 20  
PROCNO 1

F2 - Acquisition Parameters  
Date\_ 20160914  
Time\_ 16.37  
INSTRUM spect  
PROBHD 5 mm PABBO BB-  
PULPROG zg30  
TD 65536  
SOLVENT DMSO  
NS 8  
DS 2  
SWH 12019.230 Hz  
FIDRES 0.183399 Hz  
AQ 2.7263477 sec  
RG 161  
DW 41.600 usec  
DE 6.00 usec  
TE 297.2 K  
D1 1.00000000 sec  
TD0 1

===== CHANNEL f1 =====  
NUC1 1H  
P1 10.90 usec  
PL1 -3.00 dB  
SFO1 400.1324710 MHz

F2 - Processing parameters  
SI 32768  
SF 400.1299765 MHz  
WDW EM  
SSB 0  
LB 0.30 Hz  
GB 0  
PC 1.00

manishkumarmanu1986@gmail.com

**Ethyl 4-amino-2-(2-(2-trifluoromethyl-10H-phenothiazin-10-yl)-2-oxoethylthio)pyrimidine-5-carboxylate (25)**

MKS 17

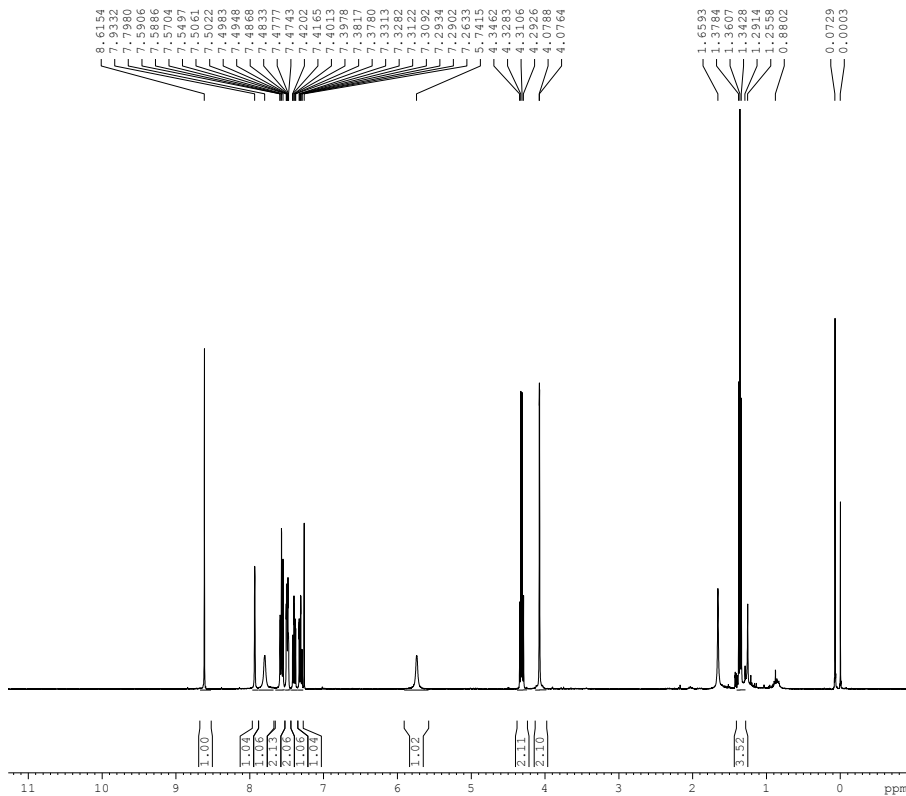

BRUKER  
AVANCE II 400 NMR  
Spectrometer  
SAIF  
Panjab University  
Chandigarh

Current Data Parameters  
NAME Aug09-2016  
EXPNO 270  
PROCNO 1

F2 - Acquisition Parameters  
Date\_ 20160810  
Time 10.12  
INSTRUM spect  
PROBHD 5 mm PABBO BB-  
PULPROG zg30  
TD 65536  
SOLVENT CDCl3  
NS 8  
DS 2  
SWH 12019.230 Hz  
FIDRES 0.183399 Hz  
AQ 2.7263477 sec  
RG 645  
DW 41.600 usec  
DE 6.00 usec  
TE 297.2 K  
D1 1.00000000 sec  
TD0 1

===== CHANNEL f1 =====  
NUC1 1H  
P1 10.90 usec  
PL1 -3.00 dB  
SFO1 400.1324710 MHz

F2 - Processing parameters  
SI 32768  
SF 400.1300085 MHz  
WDW EM  
SSB 0  
LB 0.30 Hz  
GB 0  
PC 1.00

manishkumarmanu1986@gmail.com

**Ethyl 4-amino-2-(2-(2-chloro-10H-phenothiazin-10-yl)-2-oxoethylthio)pyrimidine-5-carboxylate (26)**

MKS 11

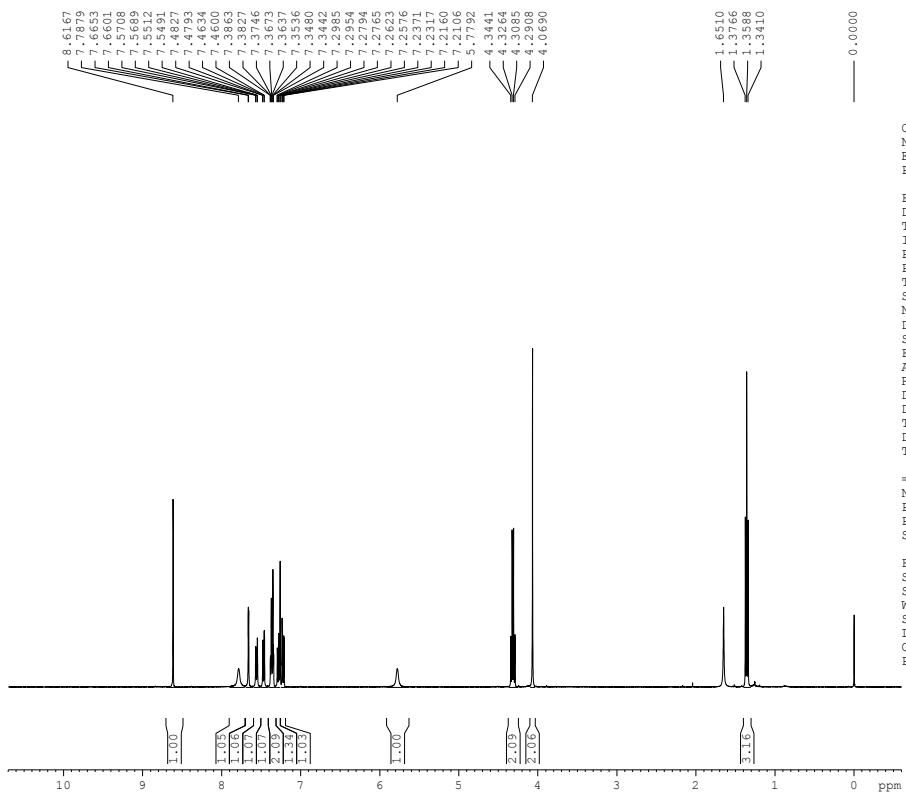

BRUKER  
AVANCE II 400 NMR  
Spectrometer  
SAIF  
Panjab University  
Chandigarh

Current Data Parameters  
NAME Jul11-2016  
EXPNO 230  
PROCNO 1

F2 - Acquisition Parameters  
Date\_ 20160711  
Time 18.21  
INSTRUM spect  
PROBHD 5 mm PABBO BB-  
PULPROG zg30  
TD 65536  
SOLVENT CDCl3  
NS 8  
DS 2  
SWH 12019.230 Hz  
FIDRES 0.183399 Hz  
AQ 2.7263477 sec  
RG 812  
DW 41.600 usec  
DE 6.00 usec  
TE 298.3 K  
D1 1.00000000 sec  
TD0 1

===== CHANNEL f1 =====  
NUC1 1H  
P1 10.90 usec  
PL1 -3.00 dB  
SFO1 400.1324710 MHz

F2 - Processing parameters  
SI 32768  
SF 400.1300087 MHz  
WDW EM  
SSB 0  
LB 0.30 Hz  
GB 0  
PC 1.00

manishkumarmanu1986@gmail.com

**Ethyl  
carboxylate (27)**

MKS16

**4-amino-2-(2-(2-methoxy-10H-phenothiazin-10-yl)-2-oxoethylthio)pyrimidine-5-**

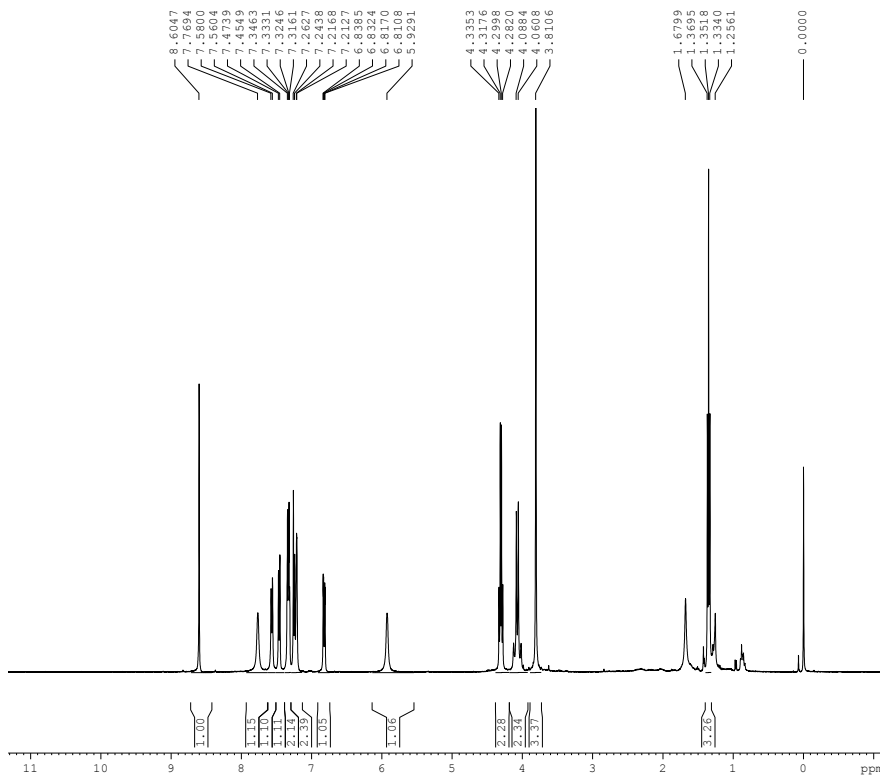

BRUKER  
AVANCE II 400 NMR  
Spectrometer  
SAIF  
Panjab University  
Chandigarh

Current Data Parameters  
NAME Nov29-2016  
EXPNO 220  
PROCNO 1

F2 - Acquisition Parameters  
Date\_ 20161129  
Time\_ 14.23  
INSTRUM spect  
PROBHD 5 mm PABBO BB-  
PULPROG zg30  
TD 65536  
SOLVENT CDCl3  
NS 8  
DS 2  
SWH 12019.230 Hz  
FIDRES 0.183399 Hz  
AQ 2.7263477 sec  
RG 322  
DW 41.600 usec  
DE 6.00 usec  
TE 298.1 K  
D1 1.00000000 sec  
TDO 1

===== CHANNEL f1 =====  
NUC1 1H  
P1 10.90 usec  
PL1 -3.00 dB  
SFO1 400.1324710 MHz

F2 - Processing parameters  
SI 32768  
SF 400.1300083 MHz  
WDW EM  
SSB 0  
LB 0.30 Hz  
GB 0  
PC 1.00

manishkumarmanu1986@gmail.com

**Ethyl 4-amino-2-(2-oxo-2-(10H-phenothiazin-10-yl)ethylthio)pyrimidine-5-carboxylate (28)**

MKS 15

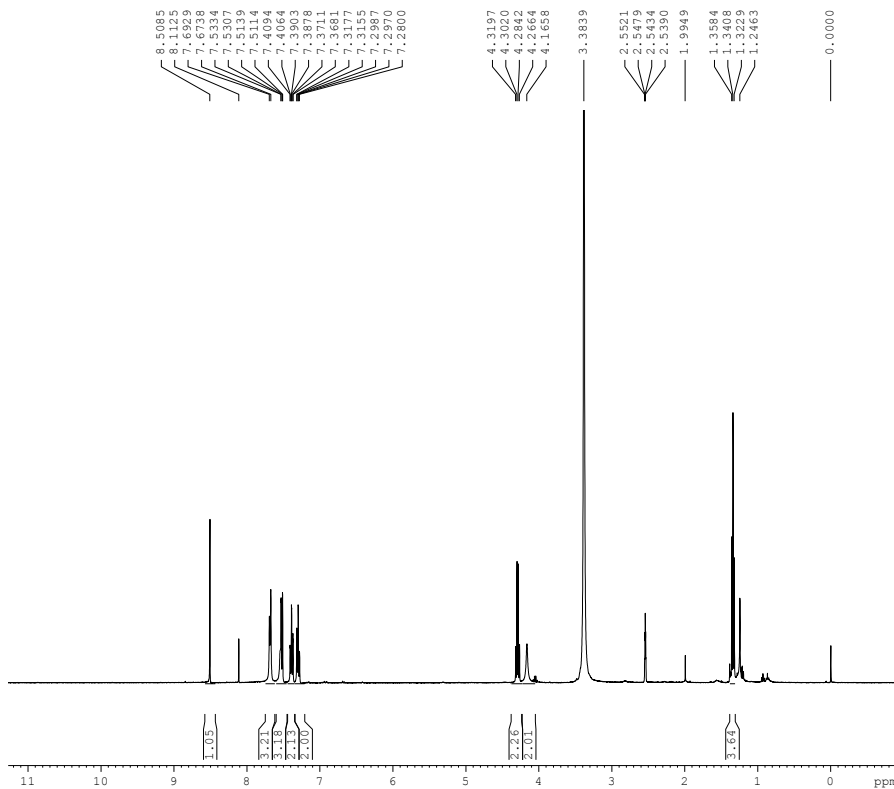

BRUKER  
AVANCE II 400 NMR  
Spectrometer  
SAIF  
Panjab University  
Chandigarh

Current Data Parameters  
NAME Aug09-2016  
EXPNO 260  
PROCNO 1

F2 - Acquisition Parameters  
Date\_ 20160810  
Time\_ 10.06  
INSTRUM spect  
PROBHD 5 mm PABBO BB-  
PULPROG zg30  
TD 65536  
SOLVENT DMSO  
NS 8  
DS 2  
SWH 12019.230 Hz  
FIDRES 0.183399 Hz  
AQ 2.7263477 sec  
RG 456  
DW 41.600 usec  
DE 6.00 usec  
TE 297.2 K  
D1 1.00000000 sec  
TDO 1

===== CHANNEL f1 =====  
NUC1 1H  
P1 10.90 usec  
PL1 -3.00 dB  
SFO1 400.1324710 MHz

F2 - Processing parameters  
SI 32768  
SF 400.1299867 MHz  
WDW EM  
SSB 0  
LB 0.30 Hz  
GB 0  
PC 1.00

manishkumarmanu1986@gmail.com

# 2-(5-(4-pyridyl)-1,3,4-oxadiazol-2-ylthio)-1-(2-trifluoromethyl-10H-phenothiazin-10-yl)ethanone (29)

MKS 20

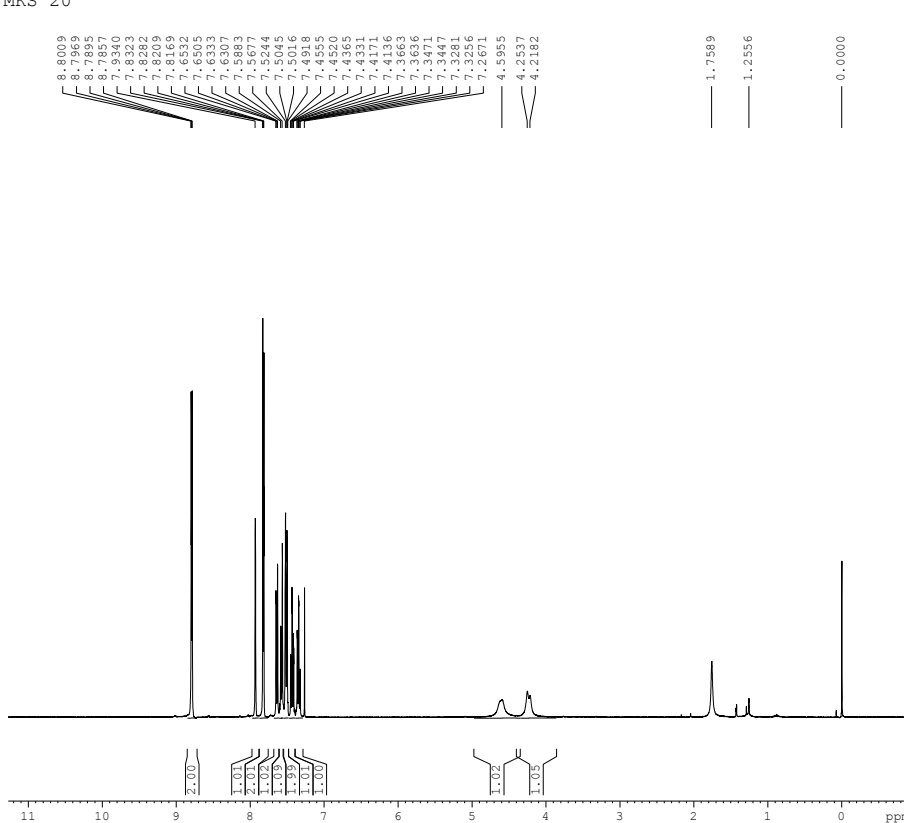

BRUKER  
AVANCE II 400 NMR  
Spectrometer  
SAIF  
Panjab University  
Chandigarh

Current Data Parameters  
NAME Aug09-2016  
EXPNO 300  
PROCNO 1

F2 - Acquisition Parameters  
Date\_ 20160810  
Time 10.31  
INSTRUM spect  
PROBHD 5 mm PABBO BB-  
PULPROG zg30  
TD 65536  
SOLVENT CDCl3  
NS 8  
DS 2  
SWH 12019.230 Hz  
FIDRES 0.183399 Hz  
AQ 2.7263477 sec  
RG 645  
DW 41.600 usec  
DE 6.00 usec  
TE 297.2 K  
D1 1.00000000 sec  
TD0 1

===== CHANNEL f1 =====  
NUC1 1H  
P1 10.90 usec  
PL1 -3.00 dB  
SFO1 400.1324710 MHz

F2 - Processing parameters  
SI 32768  
SF 400.1300068 MHz  
WDW EM  
SSB 0  
LB 0.30 Hz  
GB 0  
PC 1.00

manishkumarmanu1986@gmail.com

# 1-(2-Chloro-10H-phenothiazin-10-yl)-2-(5-(4-pyridyl)-1,3,4-oxadiazol-2-ylthio)ethanone (30)

MKS 13

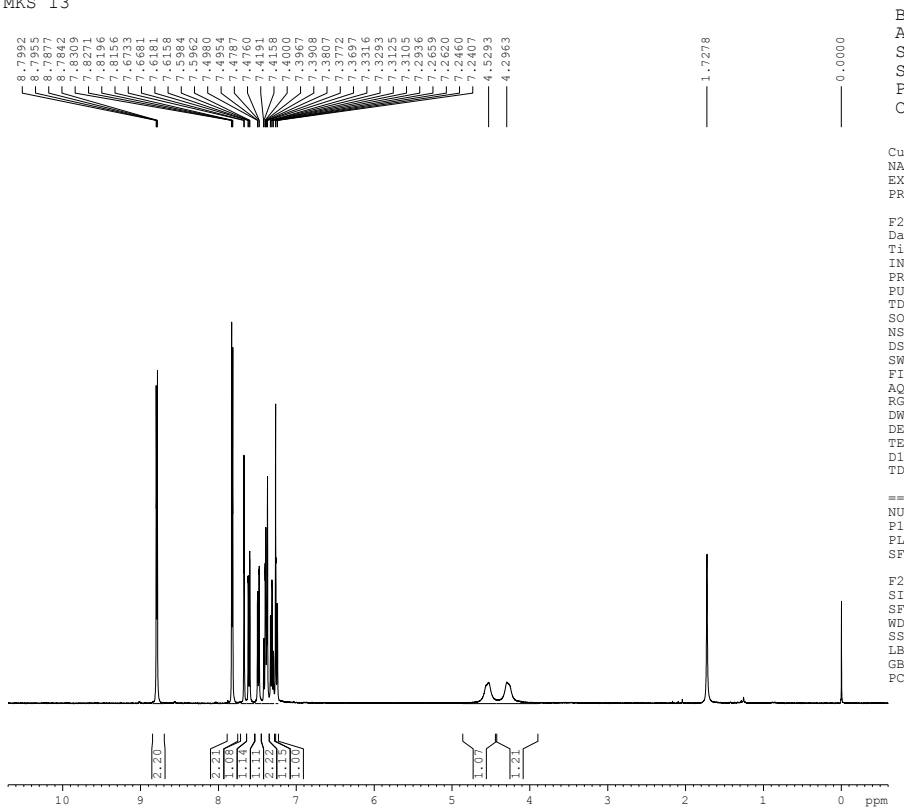

BRUKER  
AVANCE II 400 NMR  
Spectrometer  
SAIF  
Panjab University  
Chandigarh

Current Data Parameters  
NAME Jul11-2016  
EXPNO 250  
PROCNO 1

F2 - Acquisition Parameters  
Date\_ 20160711  
Time 18.32  
INSTRUM spect  
PROBHD 5 mm PABBO BB-  
PULPROG zg30  
TD 65536  
SOLVENT CDCl3  
NS 8  
DS 2  
SWH 12019.230 Hz  
FIDRES 0.183399 Hz  
AQ 2.7263477 sec  
RG 812  
DW 41.600 usec  
DE 6.00 usec  
TE 298.8 K  
D1 1.00000000 sec  
TD0 1

===== CHANNEL f1 =====  
NUC1 1H  
P1 10.90 usec  
PL1 -3.00 dB  
SFO1 400.1324710 MHz

F2 - Processing parameters  
SI 32768  
SF 400.1300074 MHz  
WDW EM  
SSB 0  
LB 0.30 Hz  
GB 0  
PC 1.00

manishkumarmanu1986@gmail.com

# 1-(2-Methoxy-10H-phenothiazin-10-yl)-2-(5-(4-pyridyl)-1,3,4-oxadiazol-2-ylthio)ethanone (31)

MKS 19

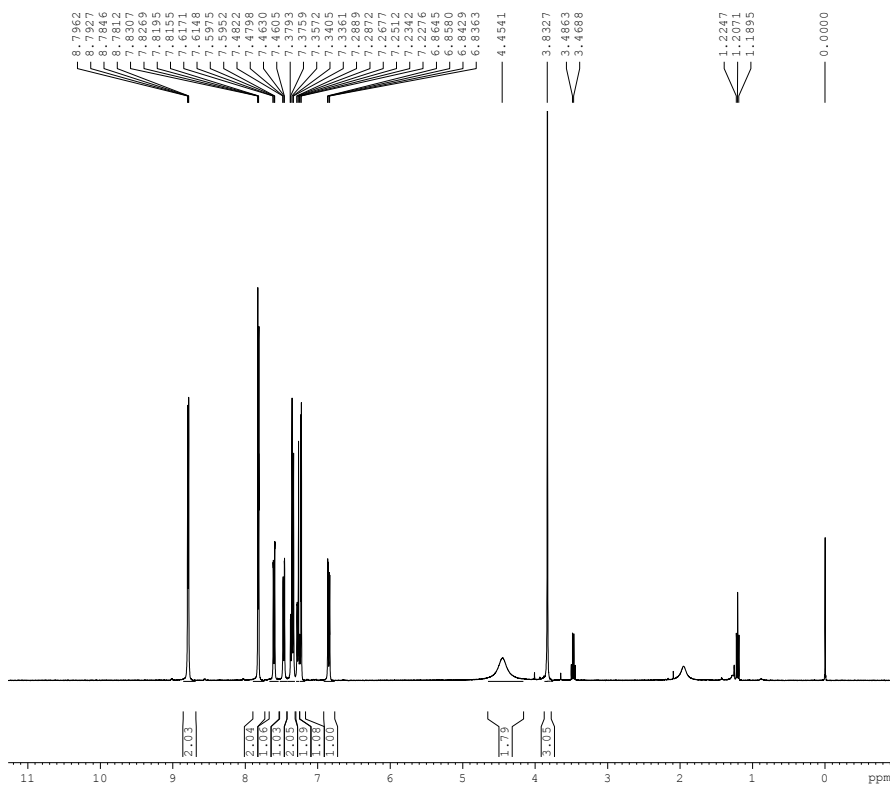

BRUKER  
 AVANCE II 400 NMR  
 Spectrometer  
 SAIF  
 Panjab University  
 Chandigarh

Current Data Parameters  
 NAME Aug09-2016  
 EXPNO 290  
 PROCNO 1

F2 - Acquisition Parameters  
 Date\_ 20160810  
 Time\_ 10.25  
 INSTRUM spect  
 PROBHD 5 mm PABBO BB-  
 PULPROG zg30  
 TD 65536  
 SOLVENT CDCl3  
 NS 8  
 DS 2  
 SWH 12019.230 Hz  
 FIDRES 0.183399 Hz  
 AQ 2.7263477 sec  
 RG 575  
 DW 41.600 usec  
 DE 6.00 usec  
 TE 297.2 K  
 D1 1.00000000 sec  
 TDO 1

===== CHANNEL f1 =====  
 NUC1 1H  
 P1 10.90 usec  
 PL1 -3.00 dB  
 SFO1 400.1324710 MHz

F2 - Processing parameters  
 SI 32768  
 SF 400.1300067 MHz  
 WDW EM  
 SSB 0  
 LB 0.30 Hz  
 GB 0  
 PC 1.00

manishkumarmanu1986@gmail.com

# 1-(10H-phenothiazin-10-yl)-2-(5-(4-pyridyl)-1,3,4-oxadiazol-2-ylthio)ethanone (32)

MKS 18

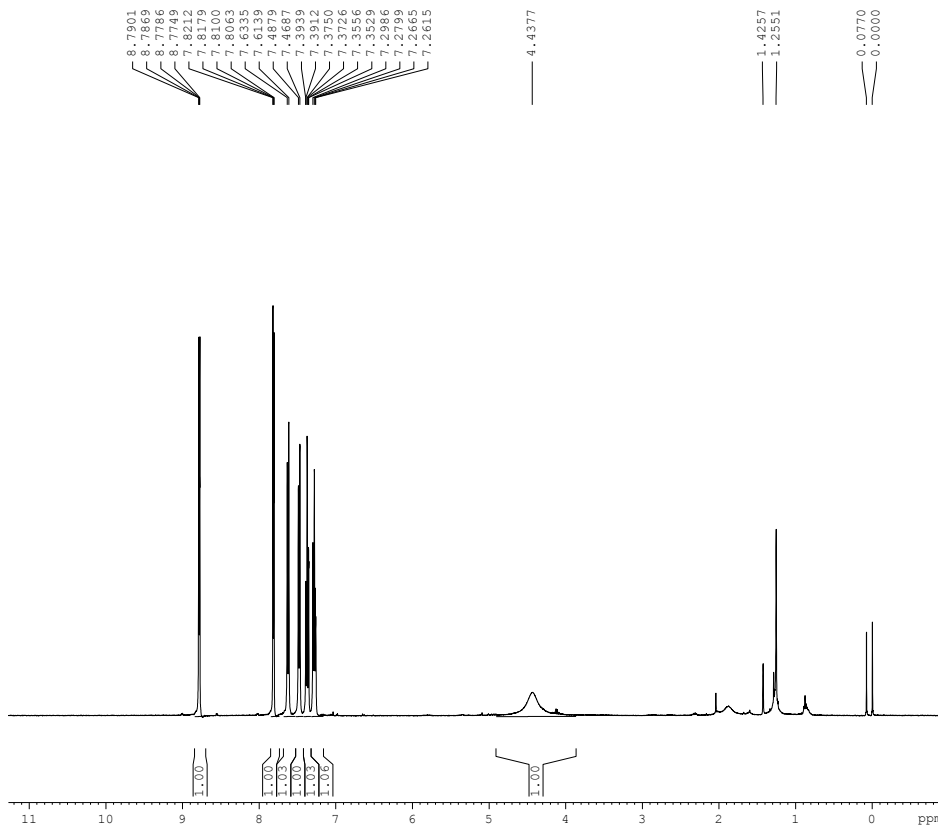

BRUKER  
 AVANCE II 400 NMR  
 Spectrometer  
 SAIF  
 Panjab University  
 Chandigarh

Current Data Parameters  
 NAME Aug09-2016  
 EXPNO 280  
 PROCNO 1

F2 - Acquisition Parameters  
 Date\_ 20160810  
 Time\_ 10.20  
 INSTRUM spect  
 PROBHD 5 mm PABBO BB-  
 PULPROG zg30  
 TD 65536  
 SOLVENT CDCl3  
 NS 8  
 DS 2  
 SWH 12019.230 Hz  
 FIDRES 0.183399 Hz  
 AQ 2.7263477 sec  
 RG 512  
 DW 41.600 usec  
 DE 6.00 usec  
 TE 297.2 K  
 D1 1.00000000 sec  
 TDO 1

===== CHANNEL f1 =====  
 NUC1 1H  
 P1 10.90 usec  
 PL1 -3.00 dB  
 SFO1 400.1324710 MHz

F2 - Processing parameters  
 SI 32768  
 SF 400.1300070 MHz  
 WDW EM  
 SSB 0  
 LB 0.30 Hz  
 GB 0  
 PC 1.00

manishkumarmanu1986@gmail.com

# 2-(4-Amino-5-(4-pyridyl)-4H-1,2,4-triazol-3-ylthio)-1-(2-(trifluoromethyl)-10H-phenothiazin-10-yl)ethanone (33)

MKS22

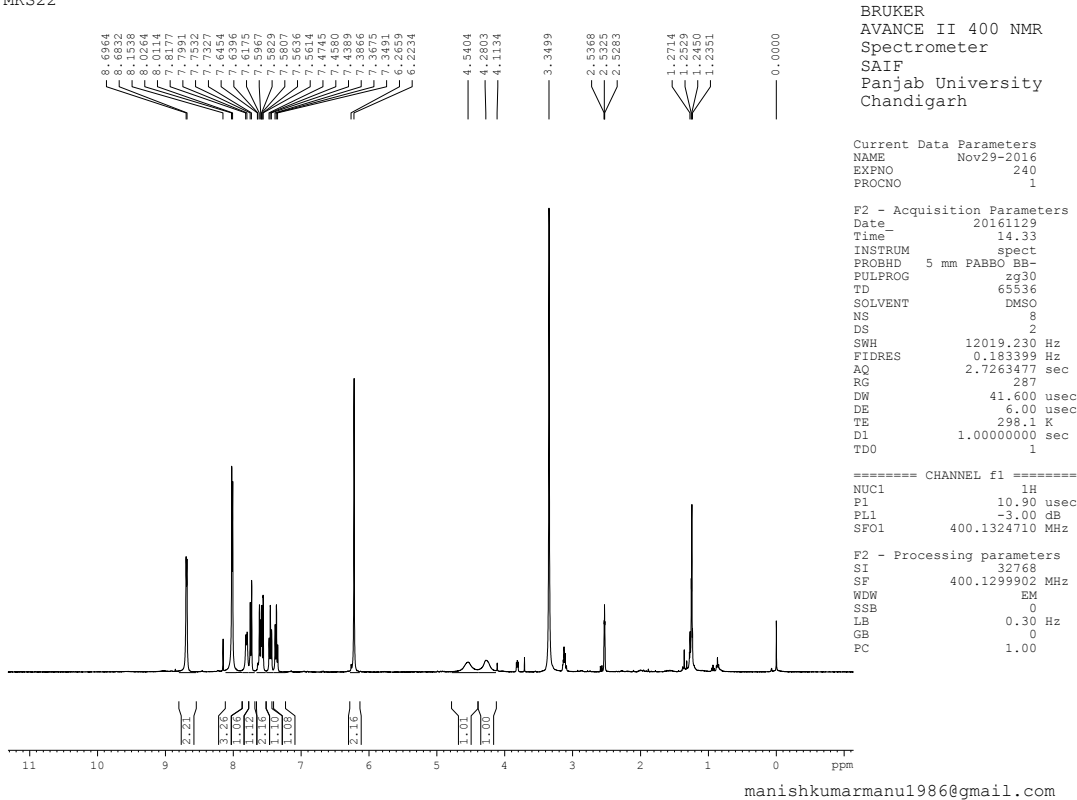

# 2-(4-Amino-5-(4-pyridyl)-4H-1,2,4-triazol-3-ylthio)-1-(2-chloro-10H-phenothiazin-10-yl)ethanone (34)

MKS 14

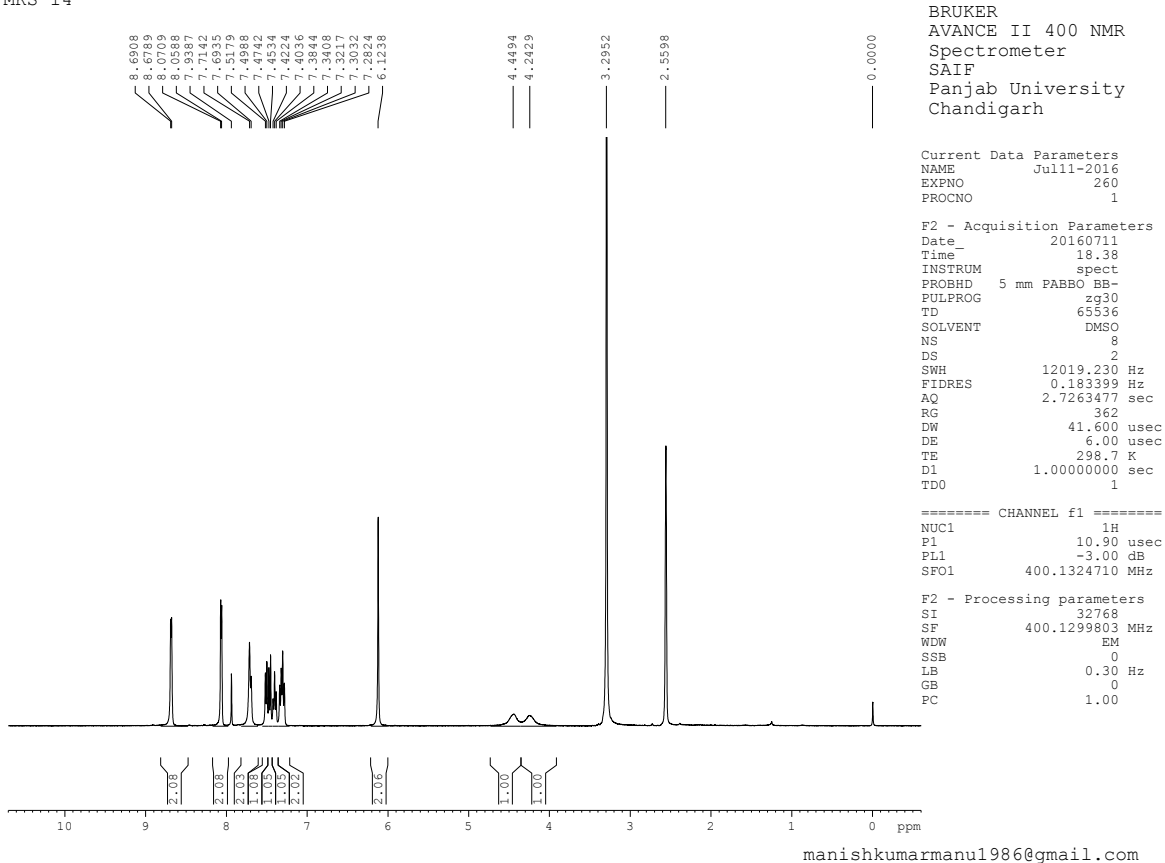



**2-(4-Amino-5-(4-pyridyl)-4H-1,2,4-triazol-3-ylthio)-1-(2-methoxy-10H-phenothiazin-10-yl)ethanone (35)**

MKS21

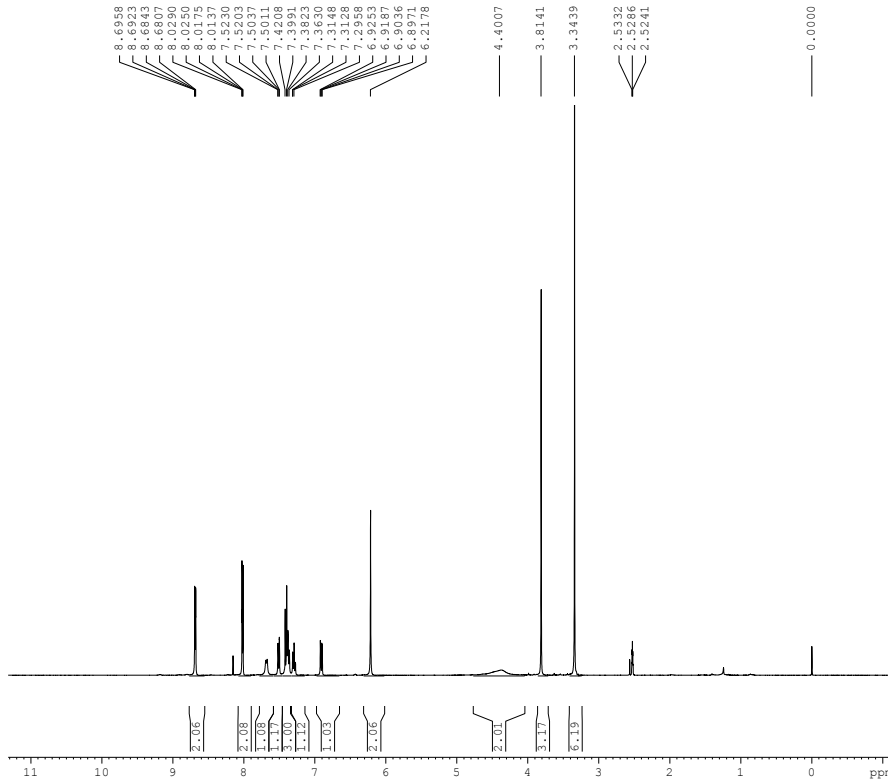

BRUKER  
AVANCE II 400 NMR  
Spectrometer  
SAIF  
Panjab University  
Chandigarh

Current Data Parameters  
NAME Nov29-2016  
EXPNO 230  
PROCNO 1

F2 - Acquisition Parameters  
Date\_ 20161129  
Time\_ 14.28  
INSTRUM spect  
PROBHD 5 mm PABBO BB-  
PULPROG zg30  
TD 65536  
SOLVENT DMSO  
NS 8  
DS 2  
SWH 12019.230 Hz  
FIDRES 0.183399 Hz  
AQ 2.7263477 sec  
RG 256  
DW 41.600 usec  
DE 6.00 usec  
TE 298.1 K  
D1 1.00000000 sec  
TD0 1

===== CHANNEL f1 =====  
NUC1 1H  
P1 10.90 usec  
PL1 -3.00 dB  
SFO1 400.1324710 MHz

F2 - Processing parameters  
SI 32768  
SF 400.1299918 MHz  
WDW EM  
SSB 0  
LB 0.30 Hz  
GB 0  
PC 1.00

manishkumarmanu1986@gmail.com

**2-(4-Amino-5-(4-pyridyl)-4H-1,2,4-triazol-3-ylthio)-1-(10H-phenothiazin-10-yl)ethanone (36)**

MKS23

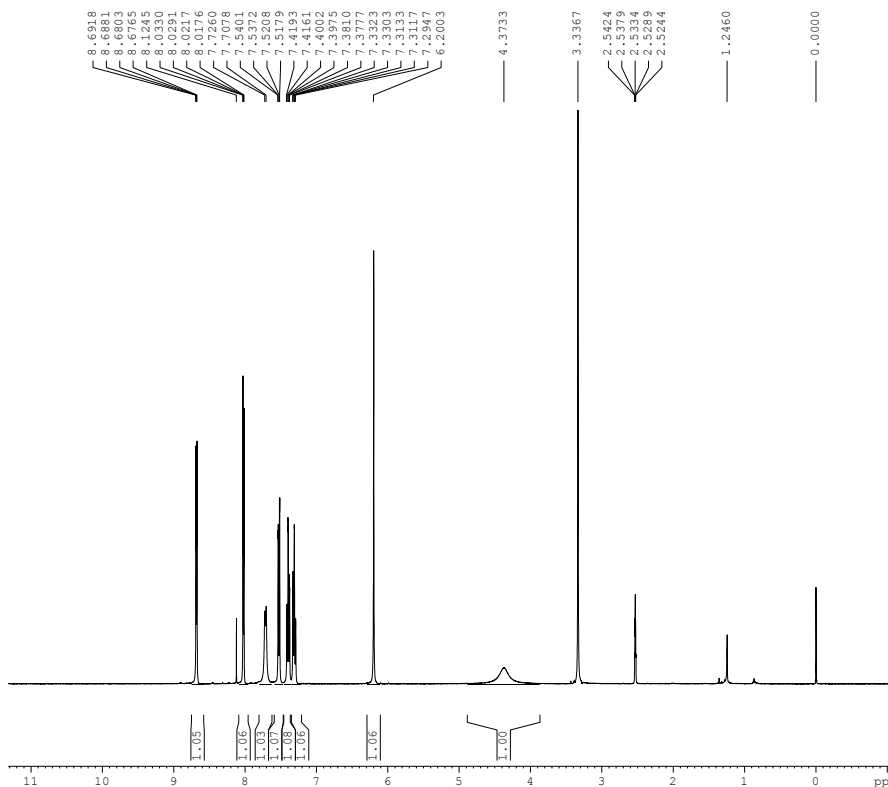

BRUKER  
AVANCE II 400 NMR  
Spectrometer  
SAIF  
Panjab University  
Chandigarh

Current Data Parameters  
NAME Nov29-2016  
EXPNO 250  
PROCNO 1

F2 - Acquisition Parameters  
Date\_ 20161129  
Time\_ 14.38  
INSTRUM spect  
PROBHD 5 mm PABBO BB-  
PULPROG zg30  
TD 65536  
SOLVENT DMSO  
NS 8  
DS 2  
SWH 12019.230 Hz  
FIDRES 0.183399 Hz  
AQ 2.7263477 sec  
RG 322  
DW 41.600 usec  
DE 6.00 usec  
TE 298.1 K  
D1 1.00000000 sec  
TD0 1

===== CHANNEL f1 =====  
NUC1 1H  
P1 10.90 usec  
PL1 -3.00 dB  
SFO1 400.1324710 MHz

F2 - Processing parameters  
SI 32768  
SF 400.1299900 MHz  
WDW EM  
SSB 0  
LB 0.30 Hz  
GB 0  
PC 1.00

manishkumarmanu1986@gmail.com

# 4-Amino-2-(3-(2-trifluoromethyl-10H-phenothiazin-10-yl)propylthio)pyrimidine-5-carbonitrile (42)

MKS-31

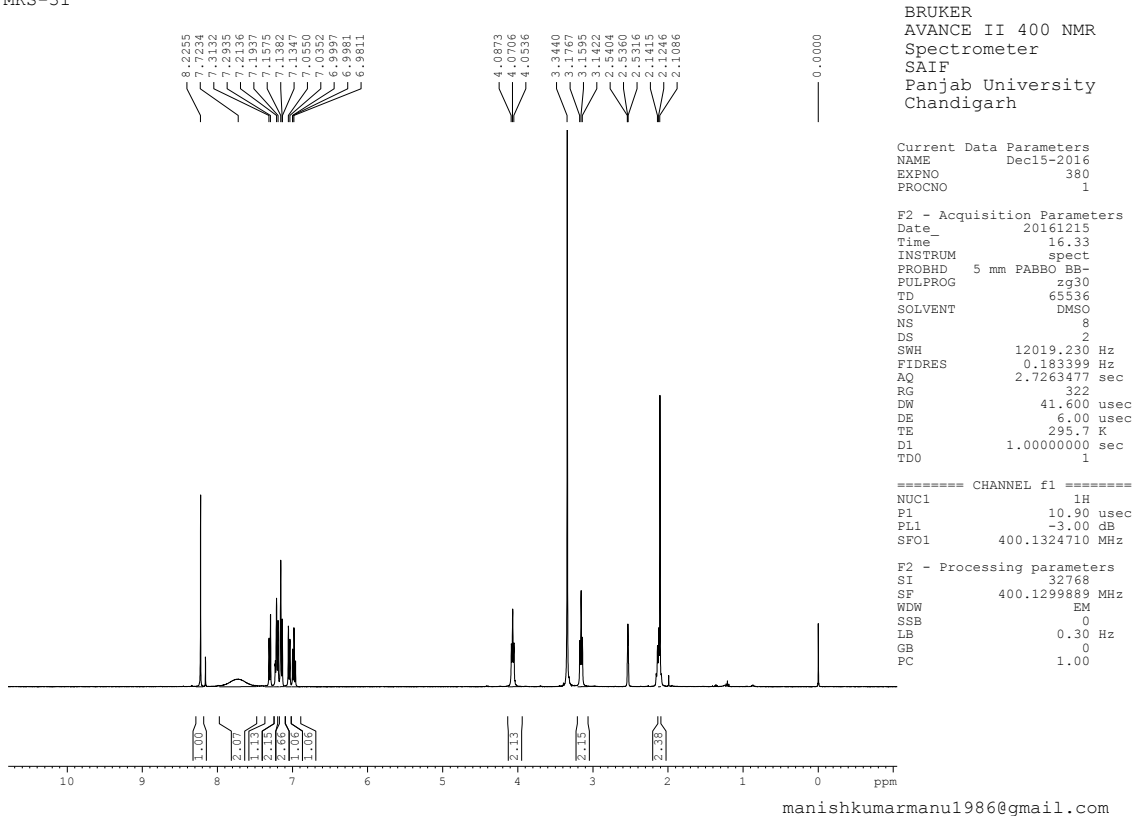

# 4-Amino-2-(3-(2-chloro-10H-phenothiazin-10-yl)propylthio)pyrimidine-5-carbonitrile (43)

MKS-28

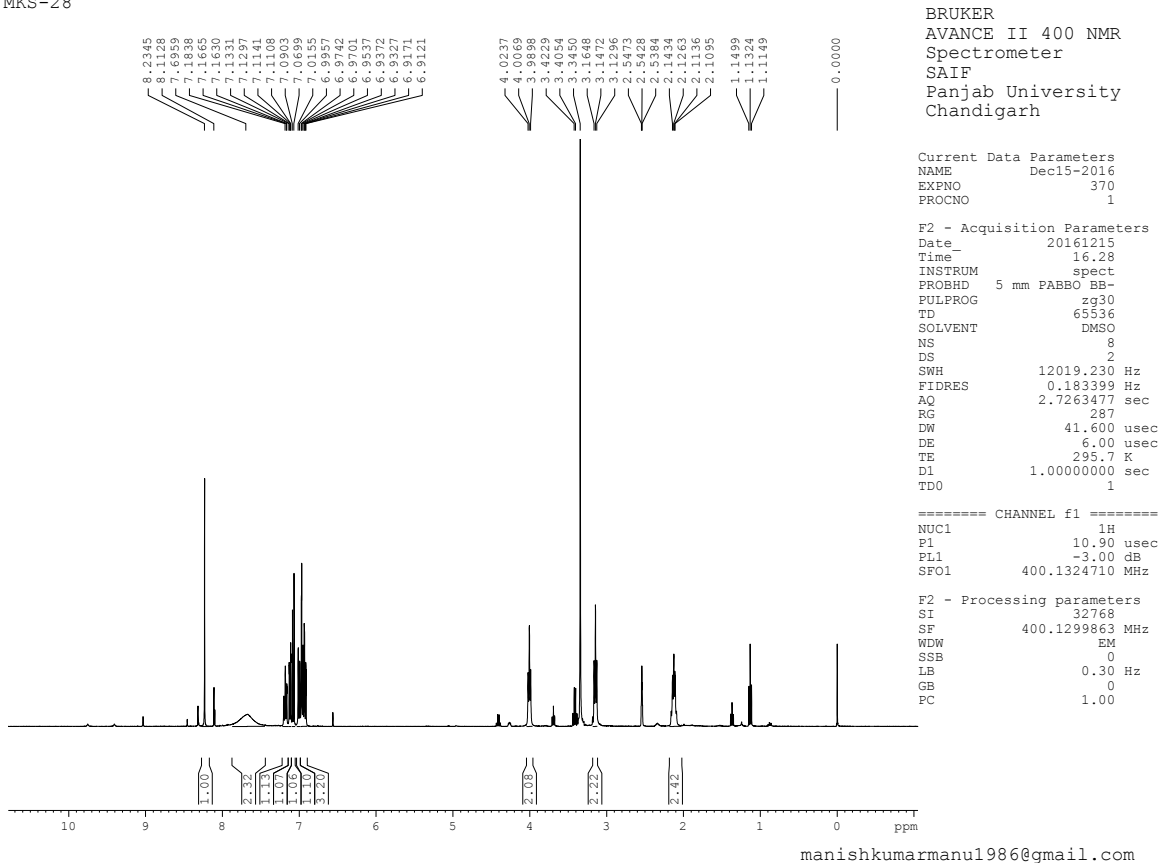

# 4-Amino-2-(3-(2-methoxy-10H-phenothiazin-10-yl)propylthio)pyrimidine-5-carbonitrile (44)

MKS-30

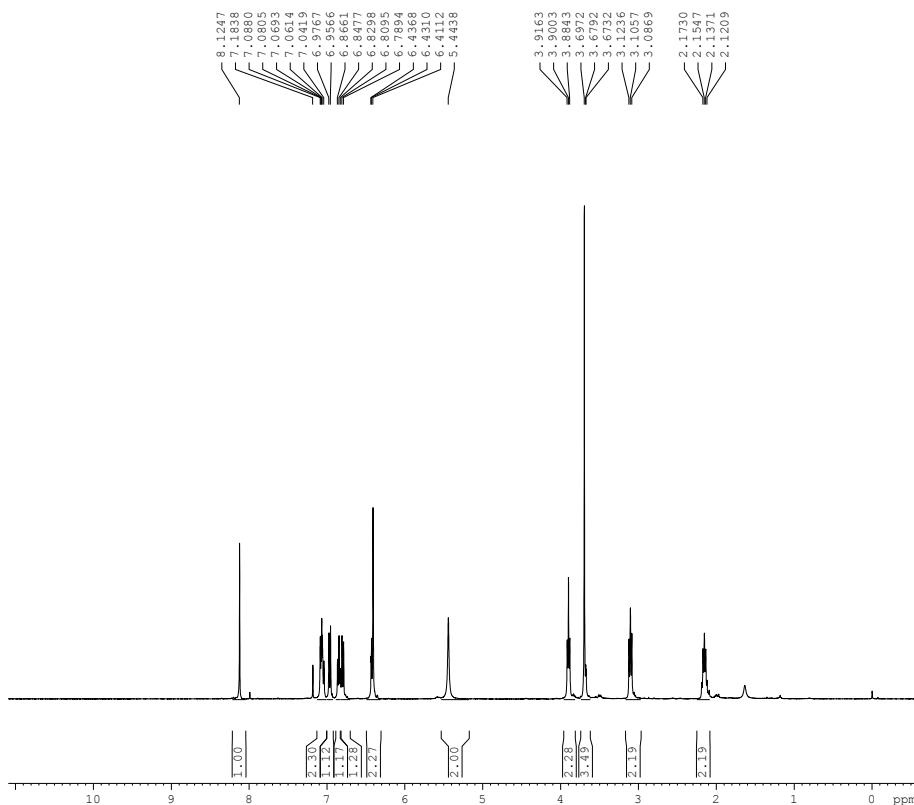

BRUKER  
AVANCE II 400 NMR  
Spectrometer  
SAIF  
Panjab University  
Chandigarh

Current Data Parameters  
NAME Dec08-2016  
EXPNO 80  
PROCNO 1

F2 - Acquisition Parameters  
Date\_ 20161208  
Time\_ 17.15  
INSTRUM spect  
PROBHD 5 mm PABBO BB-  
PULPROG zg30  
TD 65536  
SOLVENT CDCl3  
NS 8  
DS 2  
SWH 12019.230 Hz  
FIDRES 0.183399 Hz  
AQ 2.7263477 sec  
RG 406  
DW 41.600 usec  
DE 6.00 usec  
TE 296.7 K  
D1 1.00000000 sec  
TD0 1

===== CHANNEL f1 =====  
NUC1 1H  
P1 10.90 usec  
PL1 -3.00 dB  
SFO1 400.1324710 MHz

F2 - Processing parameters  
SI 32768  
SF 400.1300399 MHz  
WDW EM  
SSB 0  
LB 0.30 Hz  
GB 0  
PC 1.00

manishkumarmanu1986@gmail.com

# 4-Amino-2-(3-(10H-phenothiazin-10-yl)propylthio)pyrimidine-5-carbonitrile (45)

MKS 12

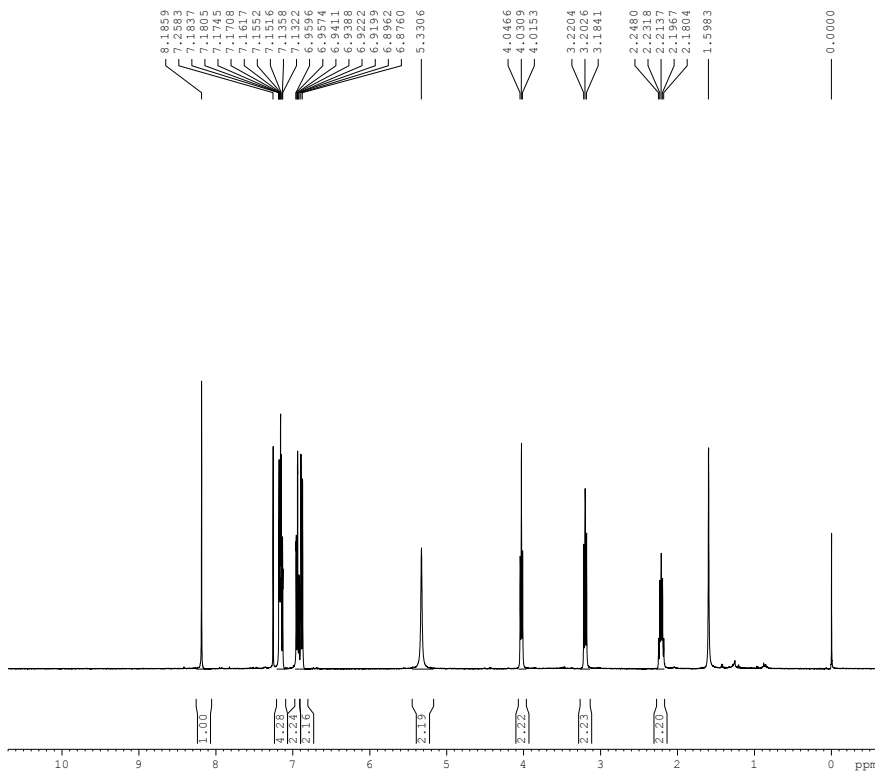

BRUKER  
AVANCE II 400 NMR  
Spectrometer  
SAIF  
Panjab University  
Chandigarh

Current Data Parameters  
NAME Jul11-2016  
EXPNO 240  
PROCNO 1

F2 - Acquisition Parameters  
Date\_ 20160711  
Time\_ 18.27  
INSTRUM spect  
PROBHD 5 mm PABBO BB-  
PULPROG zg30  
TD 65536  
SOLVENT CDCl3  
NS 8  
DS 2  
SWH 12019.230 Hz  
FIDRES 0.183399 Hz  
AQ 2.7263477 sec  
RG 456  
DW 41.600 usec  
DE 6.00 usec  
TE 298.8 K  
D1 1.00000000 sec  
TD0 1

===== CHANNEL f1 =====  
NUC1 1H  
P1 10.90 usec  
PL1 -3.00 dB  
SFO1 400.1324710 MHz

F2 - Processing parameters  
SI 32768  
SF 400.1300104 MHz  
WDW EM  
SSB 0  
LB 0.30 Hz  
GB 0  
PC 1.00

manishkumarmanu1986@gmail.com

**Ethyl  
carboxylate (46)**

**4-amino-2-(3-(2-trifluoromethyl-10H-phenothiazin-10-yl)propylthio)pyrimidine-5-**

MKS 24

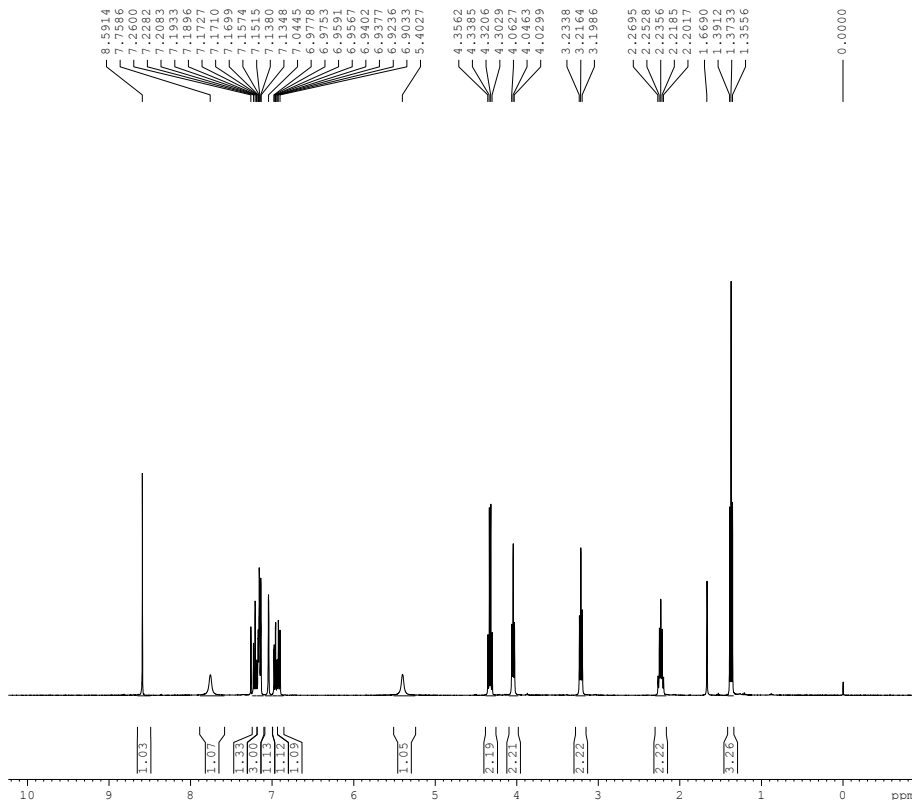

BRUKER  
AVANCE II 400 NMR  
Spectrometer  
SAIF  
Panjab University  
Chandigarh

Current Data Parameters  
NAME Sep14-2016  
EXPNO 30  
PROCNO 1

F2 - Acquisition Parameters  
Date\_ 20160914  
Time 16.42  
INSTRUM spect  
PROBHD 5 mm PABBO BB-  
PULPROG zg30  
TD 65536  
SOLVENT CDCl3  
NS 8  
DS 2  
SWH 12019.230 Hz  
FIDRES 0.183399 Hz  
AQ 2.7263477 sec  
RG 287  
DW 41.600 usec  
DE 6.00 usec  
TE 297.2 K  
D1 1.00000000 sec  
TD0 1

===== CHANNEL f1 =====  
NUC1 1H  
P1 10.90 usec  
PL1 -3.00 dB  
SF01 400.1324710 MHz

F2 - Processing parameters  
SI 32768  
SF 400.130094 MHz  
WDW EM  
SSB 0  
LB 0.30 Hz  
GB 0  
PC 1.00

manishkumarmanu1986@gmail.com

**Ethyl 4-amino-2-(3-(2-chloro-10H-phenothiazin-10-yl)propylthio)pyrimidine-5-carboxylate (47)**

MKS-27

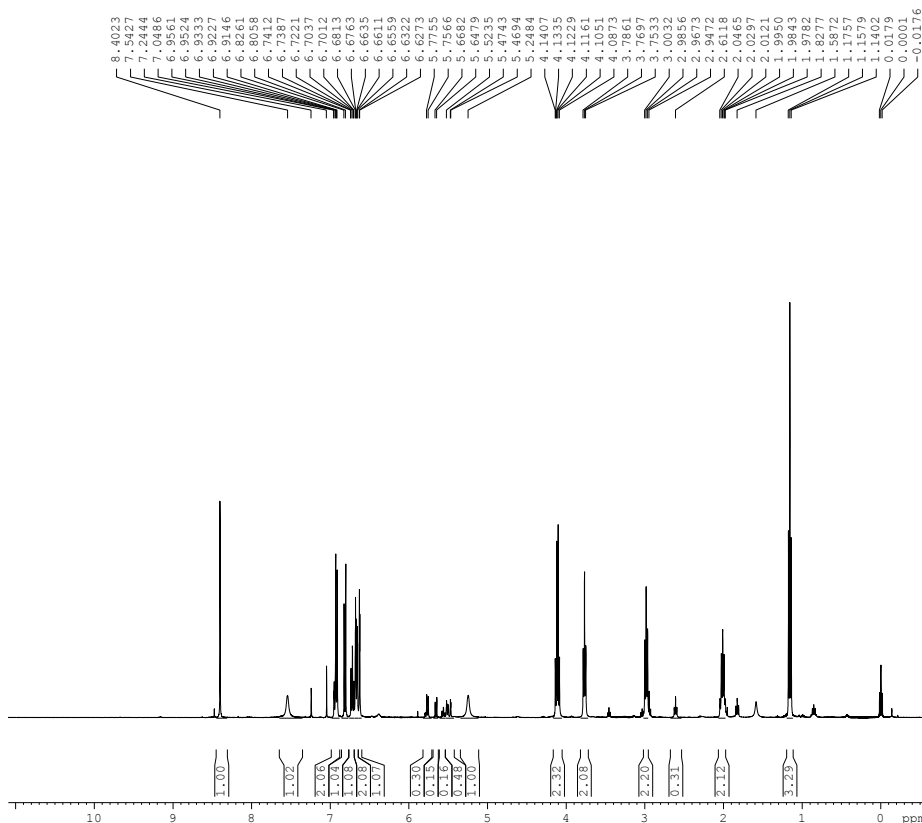

BRUKER  
AVANCE II 400 NMR  
Spectrometer  
SAIF  
Panjab University  
Chandigarh

Current Data Parameters  
NAME Dec08-2016  
EXPNO 60  
PROCNO 1

F2 - Acquisition Parameters  
Date\_ 20161208  
Time 17.04  
INSTRUM spect  
PROBHD 5 mm PABBO BB-  
PULPROG zg30  
TD 65536  
SOLVENT CDCl3  
NS 8  
DS 2  
SWH 12019.230 Hz  
FIDRES 0.183399 Hz  
AQ 2.7263477 sec  
RG 406  
DW 41.600 usec  
DE 6.00 usec  
TE 296.7 K  
D1 1.00000000 sec  
TD0 1

===== CHANNEL f1 =====  
NUC1 1H  
P1 10.90 usec  
PL1 -3.00 dB  
SF01 400.1324710 MHz

F2 - Processing parameters  
SI 32768  
SF 400.130094 MHz  
WDW EM  
SSB 0  
LB 0.30 Hz  
GB 0  
PC 1.00

manishkumarmanu1986@gmail.com

# Ethyl 4-amino-2-(3-(2-methoxy-10H-phenothiazin-10-yl)propylthio)pyrimidine-5-carboxylate (48)

MKS-29

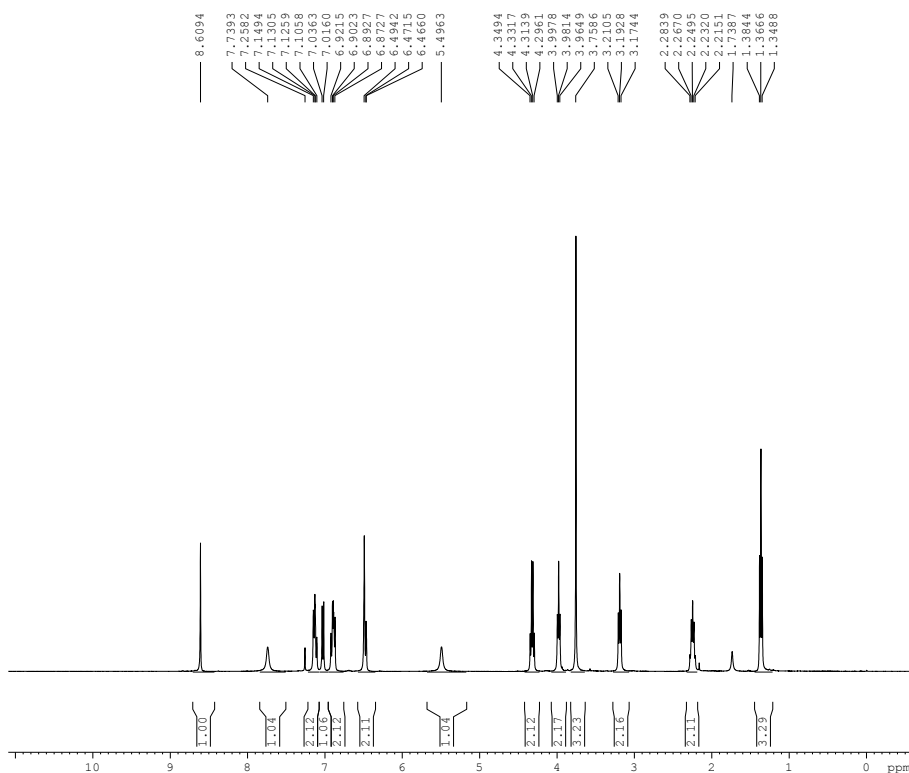

BRUKER  
 AVANCE II 400 NMR  
 Spectrometer  
 SAIF  
 Panjab University  
 Chandigarh

Current Data Parameters  
 NAME Dec08-2016  
 EXPNO 70  
 PROCNO 1

F2 - Acquisition Parameters  
 Date\_ 20161208  
 Time\_ 17.10  
 INSTRUM spect  
 PROBHD 5 mm PABBO BB-  
 PULPROG zg30  
 TD 65536  
 SOLVENT CDCl3  
 NS 8  
 DS 2  
 SWH 12019.230 Hz  
 FIDRES 0.183399 Hz  
 AQ 2.7263477 sec  
 RG 203  
 DW 41.600 usec  
 DE 6.00 usec  
 TE 296.7 K  
 D1 1.00000000 sec  
 TD0 1

===== CHANNEL f1 =====  
 NUC1 1H  
 P1 10.90 usec  
 PL1 -3.00 dB  
 SF01 400.1324710 MHz

F2 - Processing parameters  
 SI 32768  
 SF 400.1300100 MHz  
 WDW EM  
 SSB 0  
 LB 0.30 Hz  
 GB 0  
 PC 1.00

manishkumarmanu1986@gmail.com

# Ethyl 4-amino-2-(3-(10H-phenothiazin-10-yl)propylthio)pyrimidine-5-carboxylate (49)

MKS-27

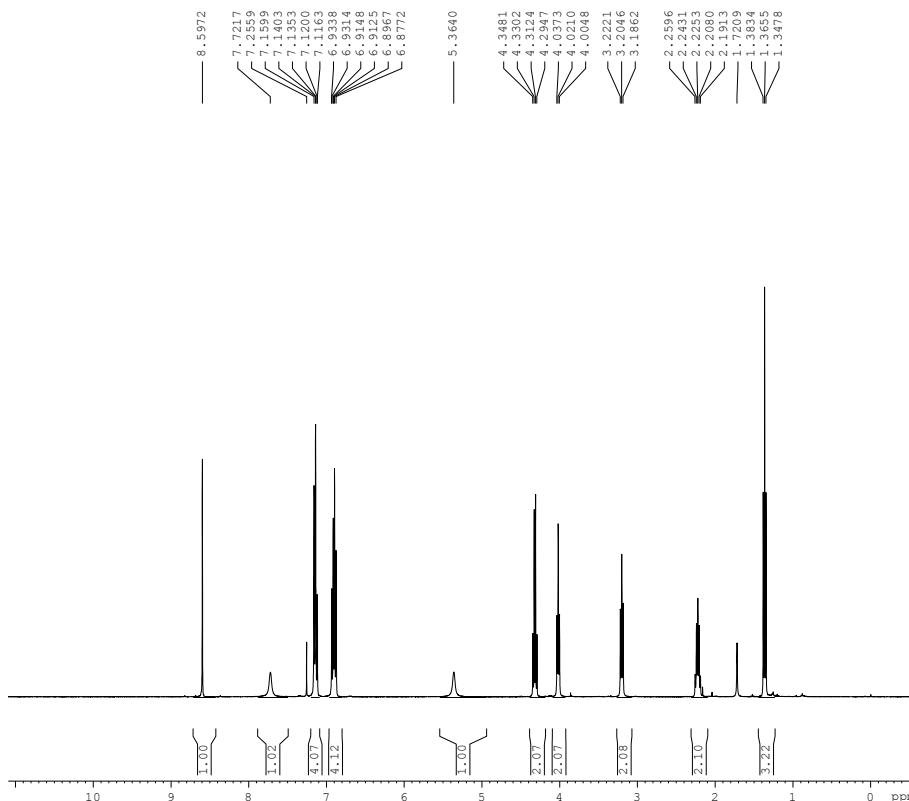

BRUKER  
 AVANCE II 400 NMR  
 Spectrometer  
 SAIF  
 Panjab University  
 Chandigarh

Current Data Parameters  
 NAME Dec08-2016  
 EXPNO 50  
 PROCNO 1

F2 - Acquisition Parameters  
 Date\_ 20161208  
 Time\_ 16.59  
 INSTRUM spect  
 PROBHD 5 mm PABBO BB-  
 PULPROG zg30  
 TD 65536  
 SOLVENT CDCl3  
 NS 8  
 DS 2  
 SWH 12019.230 Hz  
 FIDRES 0.183399 Hz  
 AQ 2.7263477 sec  
 RG 406  
 DW 41.600 usec  
 DE 6.00 usec  
 TE 296.7 K  
 D1 1.00000000 sec  
 TD0 1

===== CHANNEL f1 =====  
 NUC1 1H  
 P1 10.90 usec  
 PL1 -3.00 dB  
 SF01 400.1324710 MHz

F2 - Processing parameters  
 SI 32768  
 SF 400.1300111 MHz  
 WDW EM  
 SSB 0  
 LB 0.30 Hz  
 GB 0  
 PC 1.00

manishkumarmanu1986@gmail.com

# <sup>13</sup>C-NMR Spectra.

## 4-Amino-2-(2-(2-trifluoromethyl-10H-phenothiazin-10-yl)-2-oxoethylthio)pyrimidine-5-carbonitrile (5)

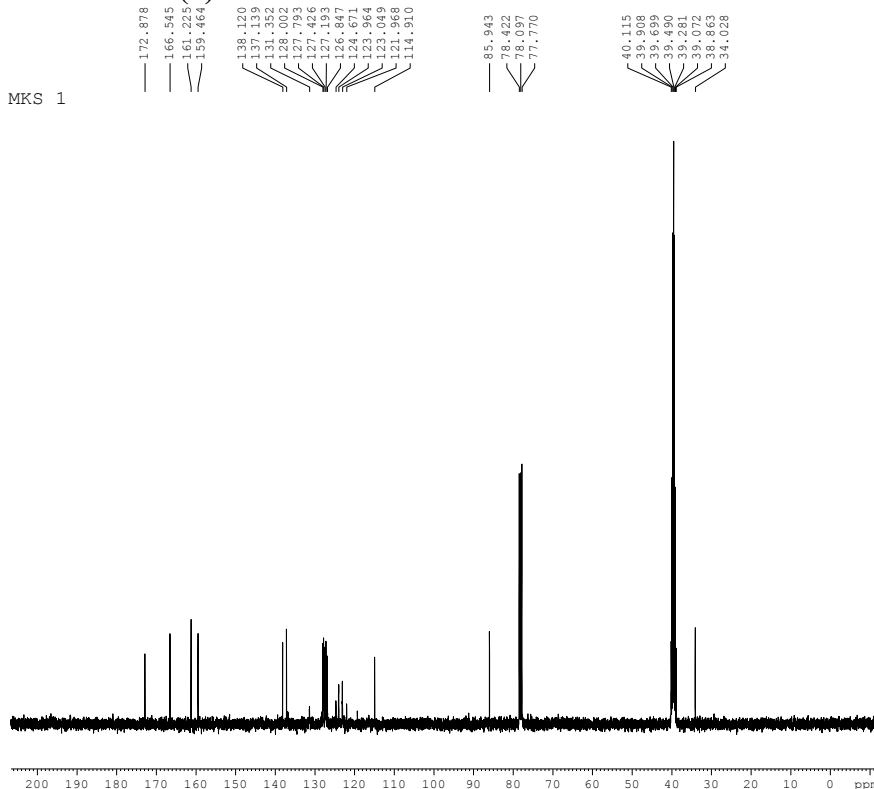

```
BRUKER
AVANCE II 400 NMR
Spectrometer
SAIF
Panjab University
Chandigarh
Current Data Parameters
NAME Jul04-2017
EXPNO 242
PROCNO 1

F2 - Acquisition Parameters
Date_ 20170705
Time 7.19
INSTRUM spect
PROBHD 5 mm PABBO BB-
PULPROG zgpg30
TD 65536
SOLVENT DMSO
NS 512
DS 4
SWH 29761.904 Hz
FIDRES 0.454131 Hz
AQ 1.1010048 sec
RG 1290
DW 16.800 usec
DE 6.50 usec
TE 296.3 K
D1 2.00000000 sec
D11 0.03000000 sec
TDO 1

===== CHANNEL f1 =====
SFO1 100.6228293 MHz
NUC1 13C
P1 9.91 usec
PLW1 41.59999847 W

===== CHANNEL f2 =====
SFO2 400.1316005 MHz
NUC2 1H
CPDPRG2 waltz16
PCPD2 90.00 usec
PLW2 6.80000019 W
PLW12 0.22578999 W
PLW13 0.11357000 W

F2 - Processing parameters
SI 32768
SF 100.6128275 MHz
WDW EM
SSB 0
LB 1.00 Hz
GB 0
PC 1.40
manishkumarmanu1986@gmail.com
```

## 4-Amino-2-(2-(2-methoxy-10H-phenothiazin-10-yl)-2-oxoethylthio)pyrimidine-5-carbonitrile (23)

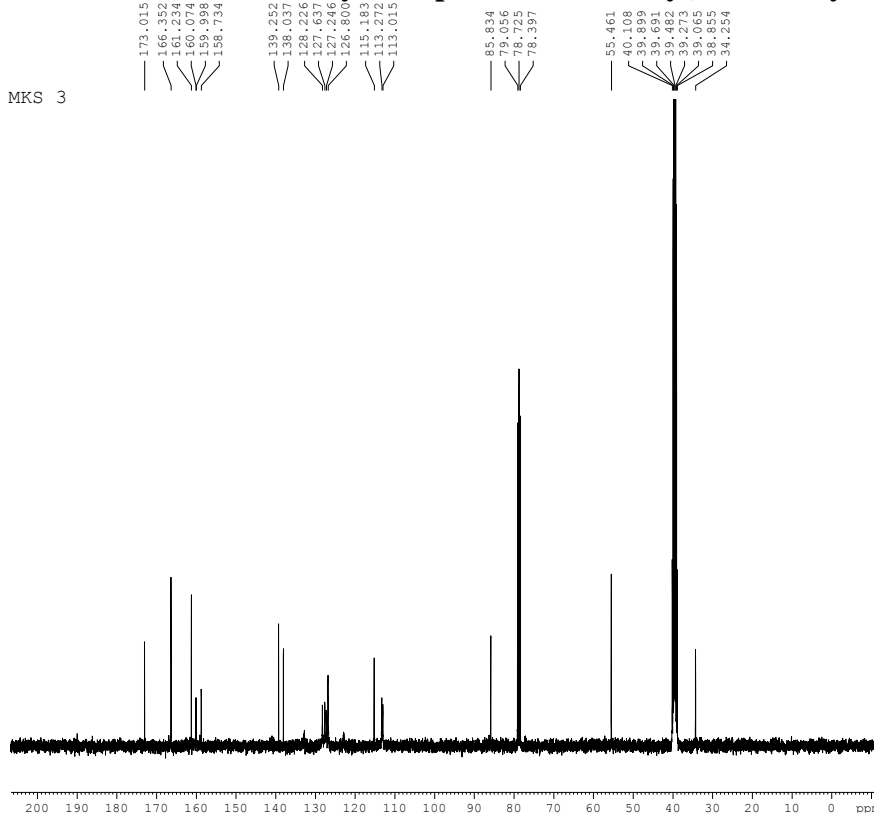

```
BRUKER
AVANCE II 400 NMR
Spectrometer
SAIF
Panjab University
Chandigarh
Current Data Parameters
NAME Jul04-2017
EXPNO 251
PROCNO 1

F2 - Acquisition Parameters
Date_ 20170705
Time 7.53
INSTRUM spect
PROBHD 5 mm PABBO BB-
PULPROG zgpg30
TD 65536
SOLVENT CDCl3
NS 512
DS 4
SWH 29761.904 Hz
FIDRES 0.454131 Hz
AQ 1.1010048 sec
RG 1290
DW 16.800 usec
DE 6.50 usec
TE 296.0 K
D1 2.00000000 sec
D11 0.03000000 sec
TDO 1

===== CHANNEL f1 =====
SFO1 100.6228293 MHz
NUC1 13C
P1 9.91 usec
PLW1 41.59999847 W

===== CHANNEL f2 =====
SFO2 400.1316005 MHz
NUC2 1H
CPDPRG2 waltz16
PCPD2 90.00 usec
PLW2 6.80000019 W
PLW12 0.22578999 W
PLW13 0.11357000 W

F2 - Processing parameters
SI 32768
SF 100.6133014 MHz
WDW EM
SSB 0
LB 1.00 Hz
GB 0
PC 1.40
manishkumarmanu1986@gmail.com
```

**Ethyl 4-amino-2-(2-(2-chloro-10H-phenothiazin-10-yl)-2-oxoethylthio)pyrimidine-5-carboxylate (26)**

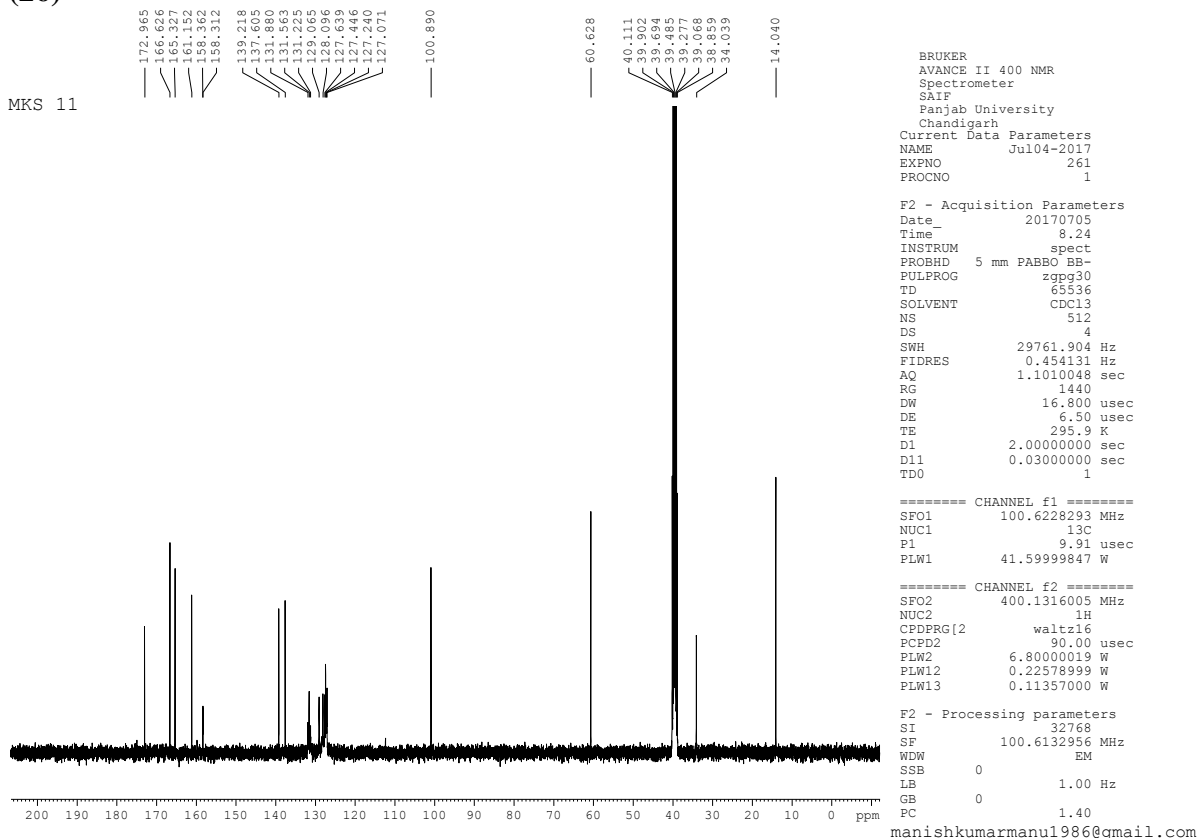

**2-(5-(4-pyridyl)-1,3,4-oxadiazol-2-ylthio)-1-(2-trifluoromethyl-10H-phenothiazin-10-yl)ethanone (29)**

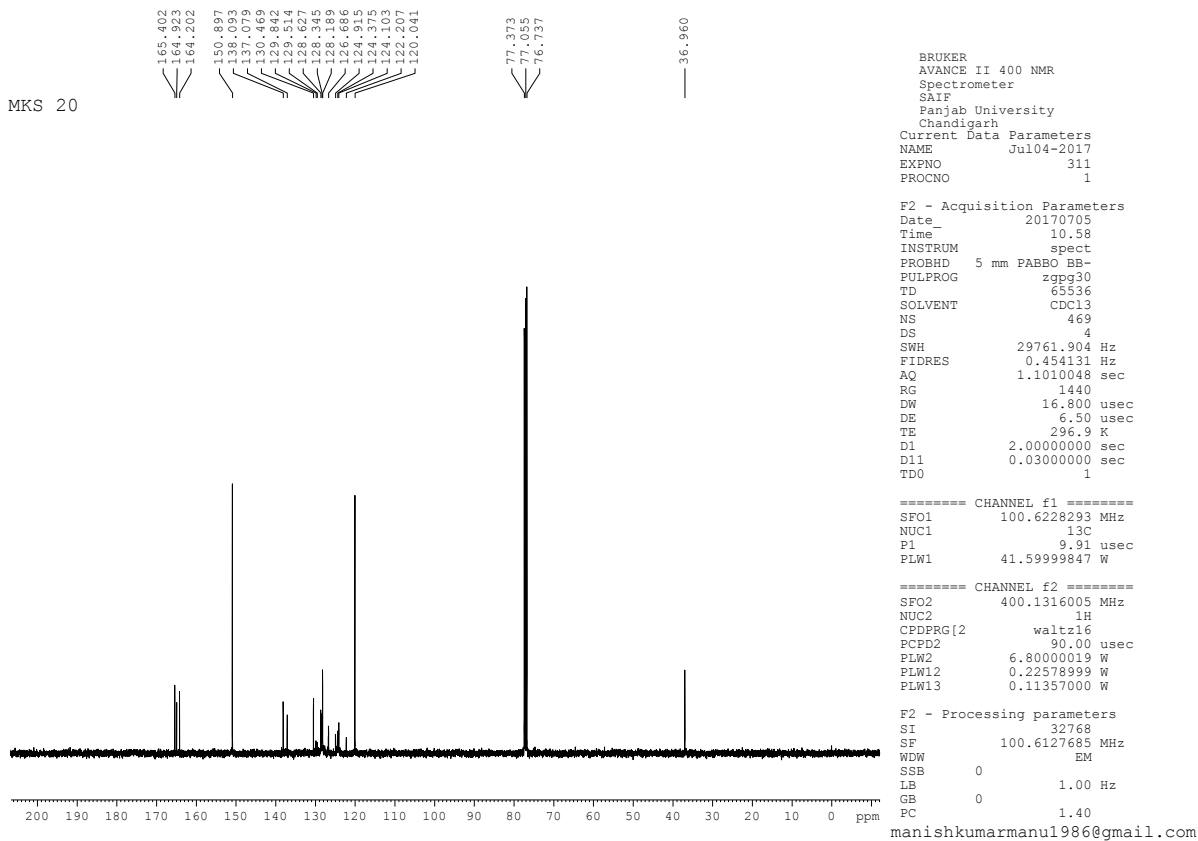

### 4-Amino-2-(3-(2-methoxy-10H-phenothiazin-10-yl)propylthio)pyrimidine-5-carbonitrile (44)

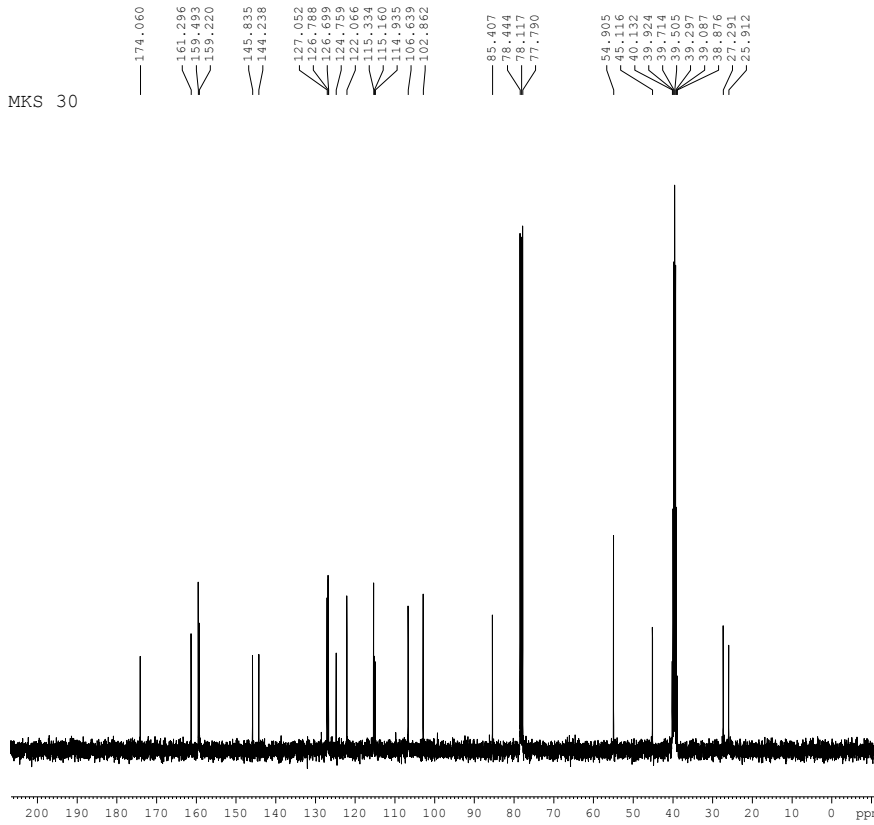

```

BRUKER
AVANCE II 400 NMR
Spectrometer
SAIF
Panjab University
Chandigarh
Current Data Parameters
NAME Jul04-2017
EXPNO 351
PROCNO 1

F2 - Acquisition Parameters
Date_ 20170705
Time 15.42
INSTRUM spect
PROBHD 5 mm PABBO BB-
PULPROG zgpg30
TD 65536
SOLVENT DMSO
NS 218
DS 4
SWH 29761.904 Hz
FIDRES 0.454131 Hz
AQ 1.1010048 sec
RG 1440
DW 16.800 usec
DE 6.50 usec
TE 297.1 K
D1 2.00000000 sec
D11 0.03000000 sec
TD0 1

===== CHANNEL f1 =====
SFO1 100.6228293 MHz
NUC1 13C
P1 9.91 usec
PLW1 41.59999847 W

===== CHANNEL f2 =====
SFO2 400.1316005 MHz
NUC2 1H
CPDPRG[2] waltz16
PCPD2 90.00 usec
PLW2 6.80000019 W
PLW12 0.22578999 W
PLW13 0.11357000 W

F2 - Processing parameters
SI 32768
SF 100.6122895 MHz
WDW EM
SSB 0
LB 1.00 Hz
GB 0
PC 1.40
manishkumarmanu1986@gmail.com
    
```

### 4-Amino-2-(3-(10H-phenothiazin-10-yl)propylthio)pyrimidine-5-carbonitrile (45)

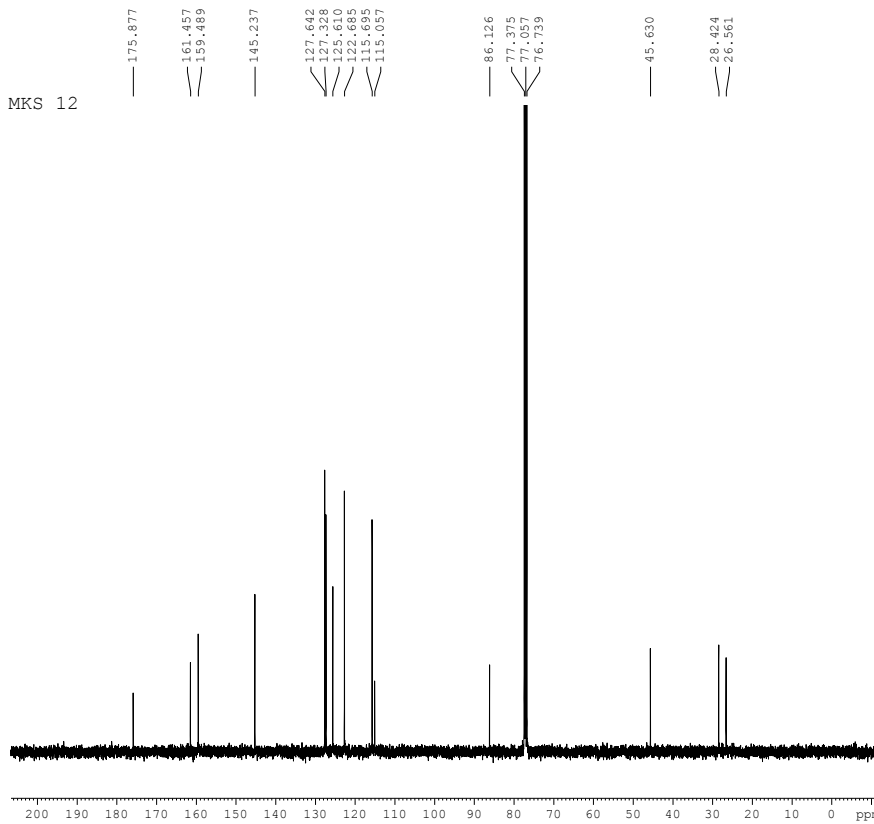

```

BRUKER
AVANCE II 400 NMR
Spectrometer
SAIF
Panjab University
Chandigarh
Current Data Parameters
NAME Jul04-2017
EXPNO 271
PROCNO 1

F2 - Acquisition Parameters
Date_ 20170705
Time 8.56
INSTRUM spect
PROBHD 5 mm PABBO BB-
PULPROG zgpg30
TD 65536
SOLVENT CDCl3
NS 512
DS 4
SWH 29761.904 Hz
FIDRES 0.454131 Hz
AQ 1.1010048 sec
RG 1290
DW 16.800 usec
DE 6.50 usec
TE 296.0 K
D1 2.00000000 sec
D11 0.03000000 sec
TD0 1

===== CHANNEL f1 =====
SFO1 100.6228293 MHz
NUC1 13C
P1 9.91 usec
PLW1 41.59999847 W

===== CHANNEL f2 =====
SFO2 400.1316005 MHz
NUC2 1H
CPDPRG[2] waltz16
PCPD2 90.00 usec
PLW2 6.80000019 W
PLW12 0.22578999 W
PLW13 0.11357000 W

F2 - Processing parameters
SI 32768
SF 100.6127685 MHz
WDW EM
SSB 0
LB 1.00 Hz
GB 0
PC 1.40
manishkumarmanu1986@gmail.com
    
```



Ethyl  
(48)

4-amino-2-(3-(2-methoxy-10H-phenothiazin-10-yl)propylthio)pyrimidine-5-carboxylate

MKS 29

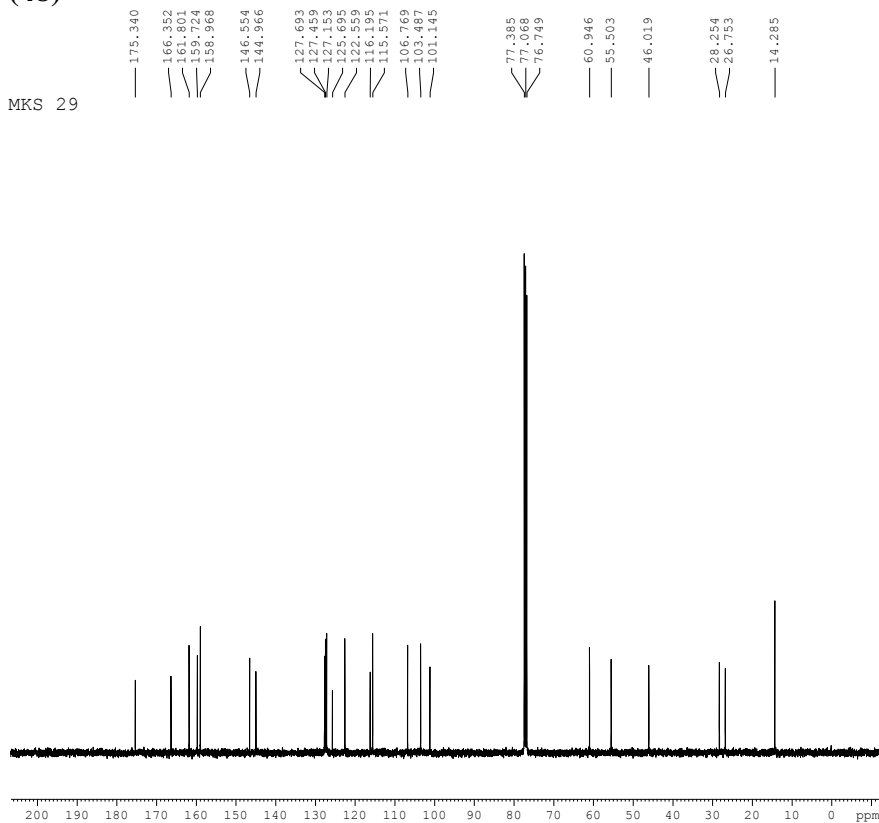

```
BRUKER
AVANCE II 400 NMR
Spectrometer
SAIF
Panjab University
Chandigarh
Current Data Parameters
NAME      Jul04-2017
EXPNO     341
PROCNO    1

F2 - Acquisition Parameters
Date_     20170705
Time      15.24
INSTRUM   spect
PROBHD    5 mm PABBO BB-
PULPROG   zgpg30
TD        65536
SOLVENT   CDCl3
NS        512
DS        4
SWH       29761.904 Hz
FIDRES    0.454131 Hz
AQ        1.1010048 sec
RG        1440
DW        16.800 usec
DE        6.50 usec
TE        296.8 K
D1        2.00000000 sec
D11       0.03000000 sec
TD0       1

===== CHANNEL f1 =====
SFO1     100.6228293 MHz
NUC1     13C
P1       9.91 usec
PLW1     41.59999847 W

===== CHANNEL f2 =====
SFO2     400.1316005 MHz
NUC2     1H
CPDPRG[2] waltz16
PCPD2    30.00 usec
PLW2     6.80000019 W
PLW12    0.22578999 W
PLW13    0.11357000 W

F2 - Processing parameters
SI       32768
SF       100.6127685 MHz
WDW      EM
SSB      0
LB       1.00 Hz
GB       0
PC       1.40
manishkumarmanu1986@gmail.com
```
